# Supplementary material for: Associating Co single atoms with RuO2nanoparticles anchor on nitrogen-doped ultrathin porous carbon nanosheets as effective bifunctional oxygen electrocatalysts for rechargeable Zn–air batteries
Source: Royal Society of Chemistry journal article supplement (doi:10.1039/d3ta03197g), 2023-01-01
Supplement: d3ta03197g1.pdf [file d3ta03197g1.pdf]

## Supporting Information

### **Associating Co single atoms with RuO<sub>2</sub> nanoparticles anchor on nitrogen-doped ultrathin porous carbon nanosheets as effective bifunctional oxygen electrocatalysts for rechargeable Zn-air batteries**

Xuena Ma,<sup>a</sup> Mingyang Liu,<sup>\*a</sup> Qi Li,<sup>a</sup> Xudong Xiao,<sup>a</sup> Jianan Liu,<sup>a</sup> Xiaoqin Xu,<sup>a</sup> Yihang Yin,<sup>a</sup>,  
Panzhe Qiao,<sup>b</sup> Luoming Zhang,<sup>a</sup> Xiaoyan Zou,<sup>\*a</sup> Ruihong Wang,<sup>\*a</sup> and Baojiang Jiang<sup>\*a</sup>

<sup>a</sup> Key Laboratory of Functional Inorganic Material Chemistry, Ministry of Education of the People's Republic of China, School of Chemistry and Materials Science, Heilongjiang University, Harbin 150080, P. R. China.

<sup>b</sup> Shanghai Synchrotron Radiation Facility, Shanghai Advanced Research Institute, Chinese Academy of Sciences, Shanghai, 201204 P. R. China.

#### **Corresponding author (s):**

\* Mingyang Liu, Ruihong Wang, Baojiang Jiang.

Xuefu Road 74#, Wangang District, Harbin, 150080, China.

E-mail: jbj@hlju.edu.cn; wangruihong@hlju.edu.cn; zxy\_18889@126.com;

lmy\_0202@163.com (M. Y. Liu).

# 1. Experimental details

## 1.1. Material characterizations

In our study, the crystal phases of samples prepared at each step were investigated by X-ray powder diffractometer (XRD, Rigaku D/max 2500 diffractometer) using Cu K $\alpha$  radiation ( $k = 1.5406\text{\AA}$ , 40 kV, 20 mA) at step scan of  $0.02^\circ$ . Raman spectra were obtained using a Renishaw UV-1000 Photon Design spectrometer at 532 nm excitation focused through a  $100\times$  microscope objective for a total interrogation spot size of  $\sim 1\ \mu\text{m}$ . The morphology and microstructure of the samples were investigated by a Scanning electron microscope (SEM, S-4800 (Japan)) equipped with energy dispersive spectrometry (EDS). Brunauer-Emmett-Teller (BET) method and Barrett-Joyner-Halenda (BJH) theory were used to analyze the specific surface area and pore size distribution (PSD), respectively. Transmission electron microscopy (TEM) and high-resolution TEM (HRTEM) images were taken by a JEM-2100 electron microscope (JEOL) with an accelerating voltage of 200 kV. N<sub>2</sub> adsorption/desorption isotherms were obtained on a JW-BK112 at 77 K. The X-ray photoelectron spectroscopy (XPS) (Kratos-AXIS UL TRA DLD, AlK $\alpha$  X-ray source) observations were conducted to analyze the surface composition of the sample. The d-band center ( $\epsilon_d$ ) as derived from valence band spectra is given by  $\epsilon_d = \int R(\epsilon)\epsilon d\epsilon / \int R(\epsilon)d\epsilon$  are added in the revised supporting information [1]. Inductively coupled plasma optical emission spectroscopy (ICP-OES) was used to confirm the compositions of the samples.

## 1.2. Electrochemical measurements

Electrochemical measurements were conducted using an electrochemical workstation with the typical three-electrode system (CHI760E, Chenhua, Shanghai). The working electrode was a glassy carbon electrode (GCE, 4 mm) coated with the prepared electrocatalysts, while the reference

electrode was a saturated calomel electrode (SCE, +0.2438 V vs. standard hydrogen electrode, 3.0 M KCl) and the counter electrodes was a Pt wire. All of the potentials were converted to the reversible hydrogen electrodes (RHE). The recorded potentials were calibrated to RHE using the following Equations (1):

$$E_{\text{RHE}} = E_{\text{SCE}} + 0.2438 + 0.0592 \times \text{pH} \quad (1)$$

in which  $E_{\text{RHE}}$  and  $E_{\text{SCE}}$  represent the potentials relative to the RHE and SCE, respectively [2, 3].

The electrocatalysts ink was obtained by ultrasonically dispersing 5 mg of the as-prepared electrocatalyst in the mixture solution of 50  $\mu\text{L}$  of 5 wt.% Nafion (Aldrich) and 100  $\mu\text{L}$  of ethanol for 30 min. Then the electrocatalyst ink was evenly dripped onto a GCE. For ORR, LSV curves was performed in the alkaline medium of  $\text{pH} = 13$  (0.1 M KOH) with the scan speed of  $5 \text{ mV} \cdot \text{s}^{-1}$  under 1600 rpm. And for OER the polarization curves were recorded in the alkaline medium of  $\text{pH} = 13$  (0.1 M KOH) with a scan rate of  $2 \text{ mV} \cdot \text{s}^{-1}$  at room temperature. Commercial Pt/C (20 wt.% Pt, on Vulcan carbon black, Hesen Electric Co. Ltd, Shanghai, China) was used as a reference for all of the tests.

### 1.3. ORR activity measurements

Cyclic voltammetry (CV) tests were cycled positively in 0.1 M KOH solution at a scan rate of  $0.05 \text{ V s}^{-1}$  (0 to 1.2 V). Linear sweep voltammetry (LSV) tests were conducted in an  $\text{O}_2$ -saturated 0.1 M KOH solution at a scan rate of  $0.001 \text{ V s}^{-1}$  (0 to 1.2V) at a rotation rate of 1600 rpm. Chronoamperometry (CA), accelerated durability test (ADT), electrochemical impedance spectroscopy (EIS), and Tafel tests were performed using the reported methods. In addition, an important parameter for evaluating OER activity is the Tafel slope  $b$ , and the corresponding Tafel plots are constructed based on the LSV curves. Determined by the following Tafel Equation 2:

$$\eta = a + b \log |J| \quad (2)$$

Where  $\eta$  is the overpotential,  $b$  is the Tafel slope, and  $J$  is the current density

Rotating disk electrode (RDE) measurements were carried out in an  $O_2$ -saturated electrolyte at a scan rate of  $0.001 \text{ V s}^{-1}$  with the rotation rates from 400 to 2500 rpm. The Koutecky-Levich (K-L) plots ( $J^{-1}$  vs  $\omega^{-1/2}$ ) were acquired in the potential range from 0.3 to 0.6 V from the RDE results, which could determine the electron transfer numbers ( $n$ ), as shown in the following Equations 3 and 4:

$$\frac{1}{j} = \frac{1}{j_L} + \frac{1}{j_K} = \frac{1}{B\omega^{1/2}} + \frac{1}{nFkC_0} \quad (3)$$

$$B = 0.62nFC_0D_0^{2/3}\nu^{-1/6} \quad (4)$$

where,  $j$  was the apparent current density,  $j_K$  was the kinetic current density,  $j_L$  was the diffusion-limiting current density,  $\omega$  was the angular velocity of the working electrode,  $n$  was the electron transfer number,  $F$  was the Faraday constant ( $96485 \text{ C mol}^{-1}$ ),  $C_0$  was the bulk concentration of  $O_2$  ( $1.2 \times 10^{-6} \text{ mol cm}^{-3}$ ),  $D_0$  was the diffusion coefficient of  $O_2$  in electrolytes ( $1.9 \times 10^{-5} \text{ cm}^2 \text{ s}^{-1}$ ), and  $\nu$  was the kinematic viscosity ( $0.01 \text{ cm}^2 \text{ s}^{-1}$ ).

Rotating ring disk electrode (RRDE) measurements were conducted at an electrode rotation speed of 1600 rpm with a scan rate of  $0.001 \text{ V s}^{-1}$ . A constant ring potential was controlled at 0.5 V in  $O_2$ -saturated 0.1 M KOH solution. The electron transfer number ( $n$ ) and the hydrogen peroxide yield [ $H_2O_2$  (%)] were obtained from RRDE voltammograms, determined by the following Equations 5 and 6:

$$n = 4 \times \frac{I_d}{I_d + (I_r/N)} \quad (5)$$

$$H_2O_2\% = 200 \times \frac{I_r/N}{I_d + (I_r/N)} \quad (6)$$

Where  $I_d$  and  $I_r$  were the disk current and the ring current, respectively; N was  $H_2O_2$  collection efficiency of the Pt ring with the value of 0.37.

#### 1.4. OER activity measurements

OER tests were performed in 0.1 M KOH electrolyte solution. Linear sweep voltammetry (LSV) was carried out at a scan rate of 2 mV s<sup>-1</sup> for the polarization curves, without iR-compensation correction [4-7]. The durability of catalyst after 10000 CV cycles was studied by using the accelerated durability test (ADT). EIS tests were performed at 1.58 V vs. RHE with frequencies ranging from 100 kHz to 100 MHz [8,9]. The electrochemically active area was calculated from the electrical double layer capacitance measurements, which were cycled at scan rates of 40, 60, 80, 100, and 120 mV s<sup>-1</sup> with a potential range from 0.96 to 1.06 V vs. RHE. Tafel and CA tests were performed using the reported methods.

Moreover, one of the genuine approaches for electrochemical active sites measurement is the electrochemical surface area calculation via electrical double-layer capacitance ( $C_{dl}$ ) using cyclic voltammetry (CV) [10-12]. Which are converted to ECSA according to the following Equations 7:

$$ECSA = C_{dl}/C_s \quad (7)$$

The specific capacitance ( $C_s$ ) value  $C_s=0.040$  mF cm<sup>-2</sup> in 0.1 M KOH is adopted from previous reports.

#### 1.5. Fabrication of home-made Zn-air batteries

The primary battery was designed at room temperature with an oxygen-saturated 6.0 M KOH solution containing 0.2 M Zn (Ac)<sub>2</sub> as electrolyte, using a polished Zn plate as the anode and the

composite substrates (hydrophobic carbon paper + waterproof membrane + nickel foam) produced in Changsha Spring New Energy Technology Co., Ltd as the catalyst carrier of the air electrode. Catalyst ink was prepared by mixing 50  $\mu\text{L}$  of 5 wt.% Nafion (Aldrich), 1 mL of ethanol and 5 mg  $\text{Co}_{\text{SA}}\text{-RuO}_2\text{-NUCN}$  powder, which was then coated on composite substrates (1 cm $\times$ 1 cm) as air cathodes [13]. Celgard 2340 membrane (A 38  $\mu\text{m}$  microporous trilayer membrane with one polyethylene layer between two polypropylene layers) was used a separator to prevent physical contact between the cathode and anode. The electrocatalyst loading was about 1.0 mg $\cdot\text{cm}^{-2}$ . The polarization curve was measured at a scan rate of 10 mV s $^{-1}$  [14,15]. The galvanostatic recharge/discharge cycling measurements were collected on a CT-2001A testing system at a current density of 10 mA cm $^{-2}$ . For comparison, the mixture slurry of  $\text{RuO}_2$  and 20 wt% Pt/C with a mass ratio of 1:1 was dropwise added onto above-mentioned composite substrates with the area of 1 cm $^2$  to ensure a loading amount of 1 mg cm $^{-2}$  as the air cathode. It was also used to assemble the Zn-air battery and performed the practical application at the same conditions.

The power density (mW cm $^{-2}$ ) and specific capacity (mAh g $^{-1}$ ) of zinc-air batteries with Pt/C +  $\text{IrO}_2$  and  $\text{Co}_{\text{SA}}\text{-RuO}_2\text{-NUCN}$  based air cathode were determined by using following Equations 8 and 9.

$$\text{Power density (mW cm}^{-2}\text{)} = \text{Voltage} \times \text{Current density} \quad (8)$$

$$\text{Specific capacity (mAh g}^{-1}\text{)} = \frac{\text{Current} \times \text{Service hours}}{\text{Weight of consumed Zn}} \quad (9)$$

## 1.6 Computational methods

All calculations were conducted by Vienna abinitio simulation packages (VASP) within electronic wave function, which were expanded using the projector augmented wave method with an energy

cutoff of 400 eV to represent the basic set. The general gradient approximation (GGA) with Perdew-Burker-Ernzerhof (PBE) was used to describe the exchange-correlation function. The wave function was optimized using an accuracy of  $10^{-6}$  eV. The k point mesh of  $2 \times 2 \times 1$  was selected to treat the integration over the Brillouin zone for geometry optimization. 15 Å of vacuum separated slab in Z direction to avoid interaction between neighboring slabs.

## 2. Results and discussion

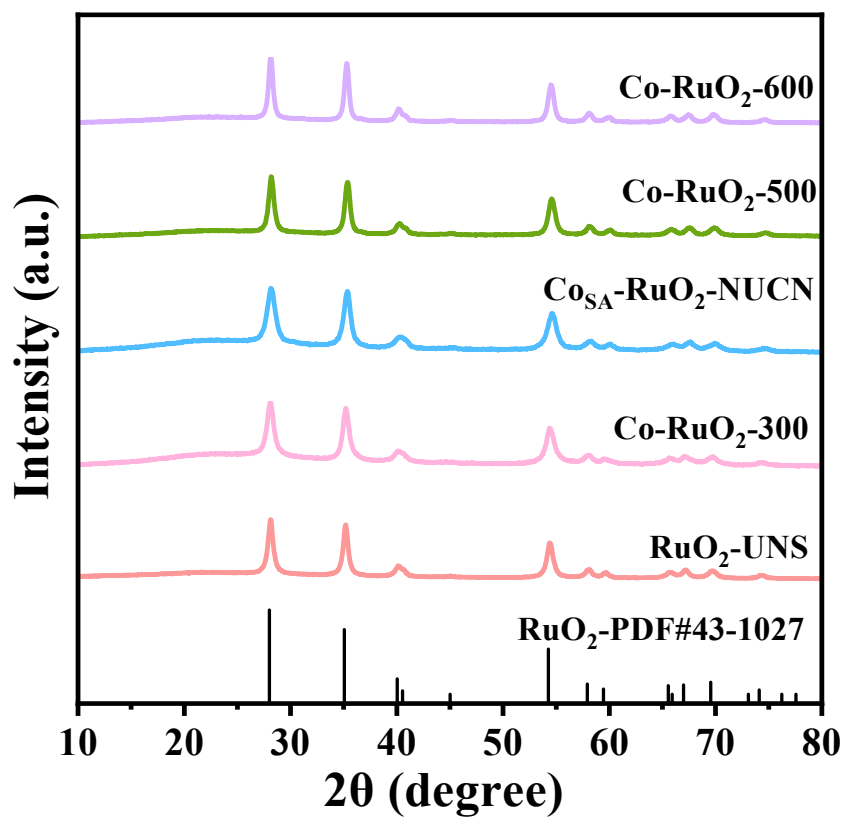

**Fig. S1.** XRD patterns of RuO<sub>2</sub>-UNS, Co-RuO<sub>2</sub>-300, Co<sub>SA</sub>-RuO<sub>2</sub>-NUCN, Co-RuO<sub>2</sub>-500 and Co-RuO<sub>2</sub>-600.



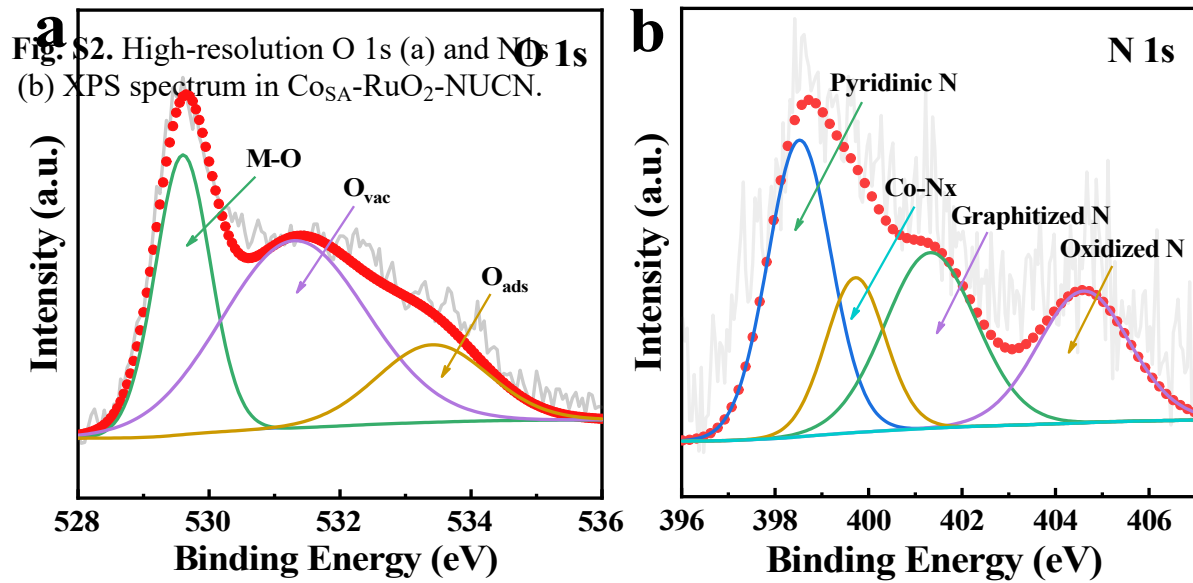

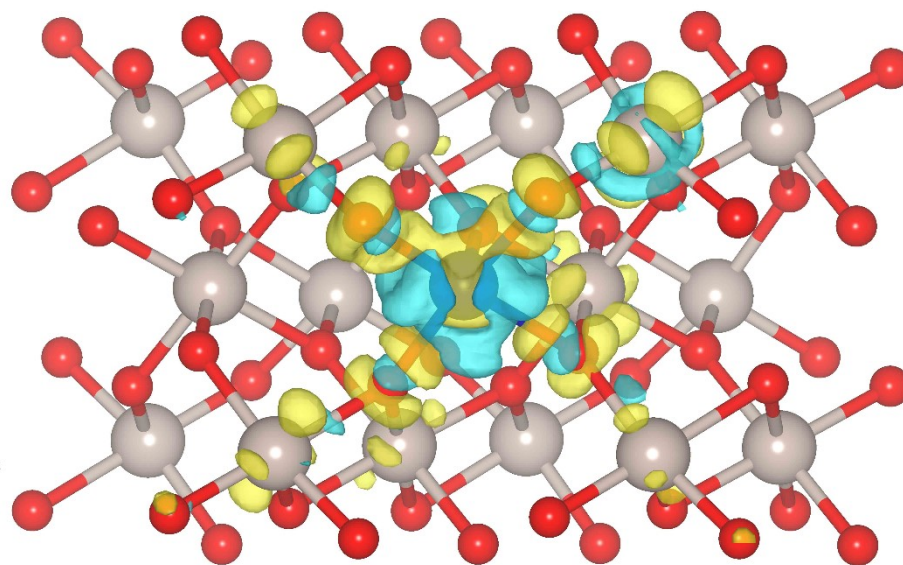

**Fig. S3.** Charge density difference diagrams (blue area for charge depletion and yellow area for charge accumulation). (Red-O atom, Gray-Ru atom, Purple-Co atom)

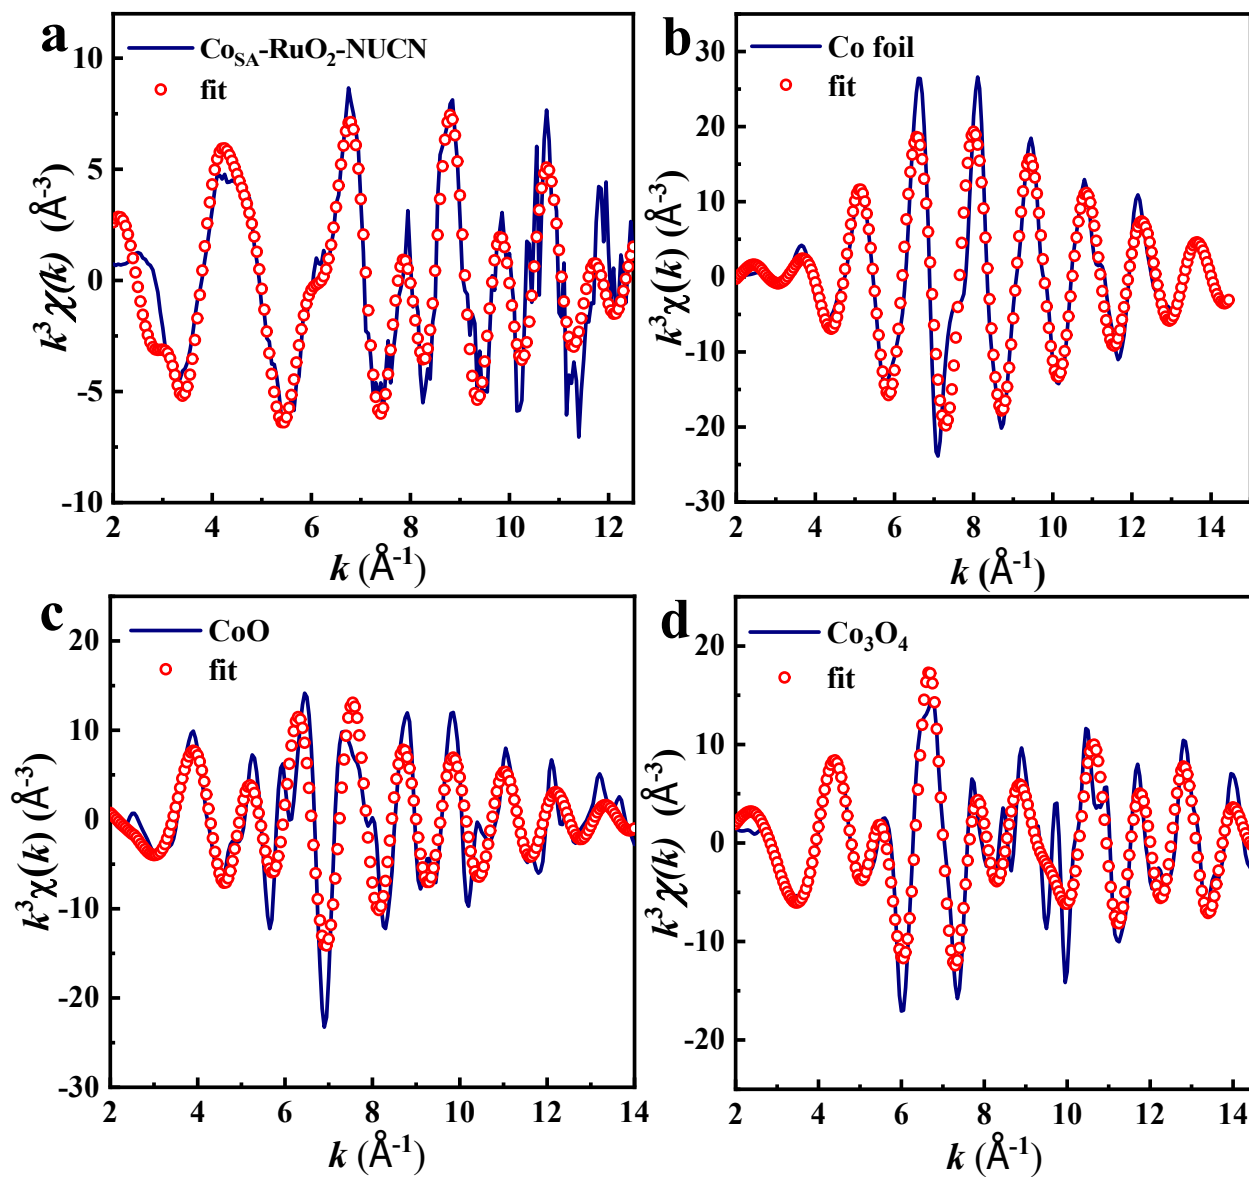

**Fig. S4.** Typical EXAFS fitting curves of Co for  $\text{Co}_{\text{SA}}\text{-RuO}_2\text{-NUCN}$  (a), Co foil (b), CoO (c) and  $\text{Co}_3\text{O}_4$  (d) at K space.

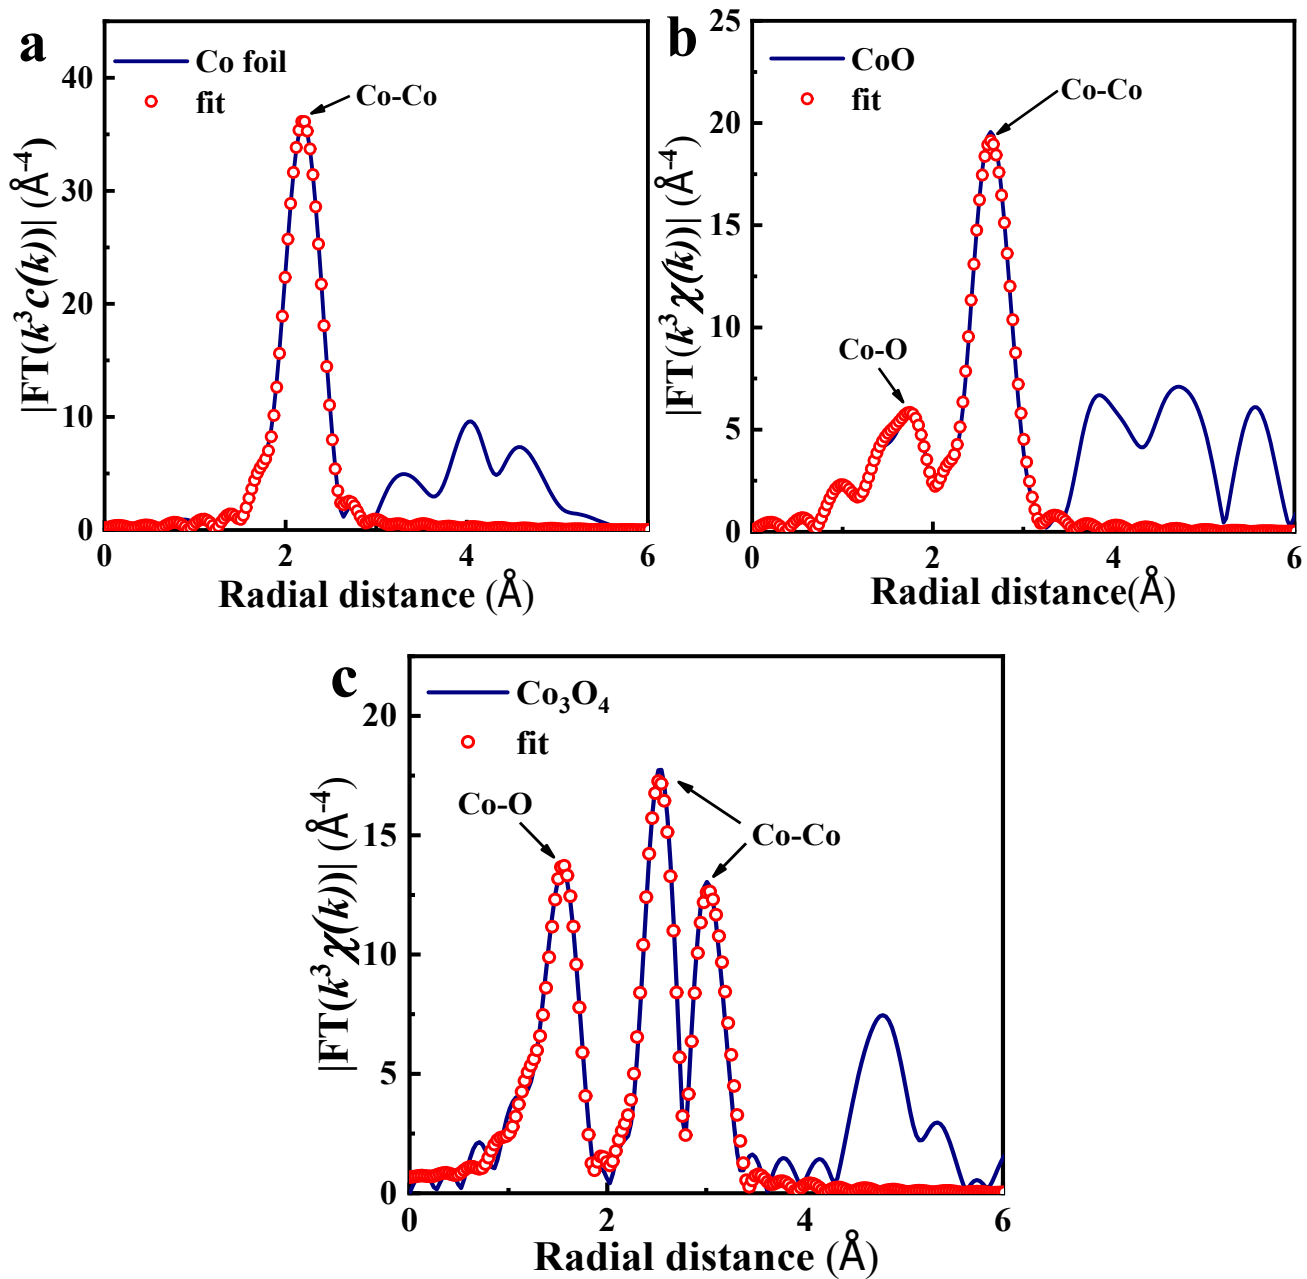

Fig. S5. The corresponding EXAFS fitting curve of Co foil (a), CoO (b) and  $\text{Co}_3\text{O}_4$  (c) at R space.

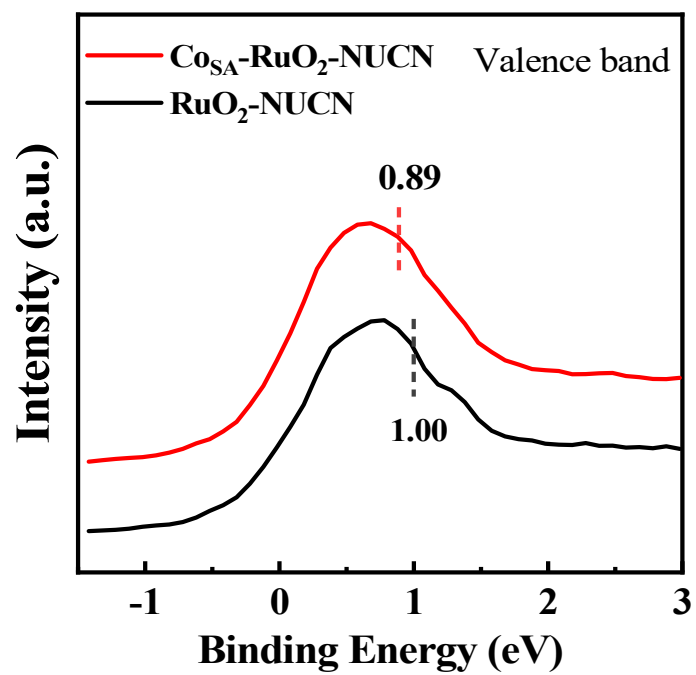

**Fig. S6.** The XPS valence band spectra and calculated d-band centers in the energy region between -1 and 3.

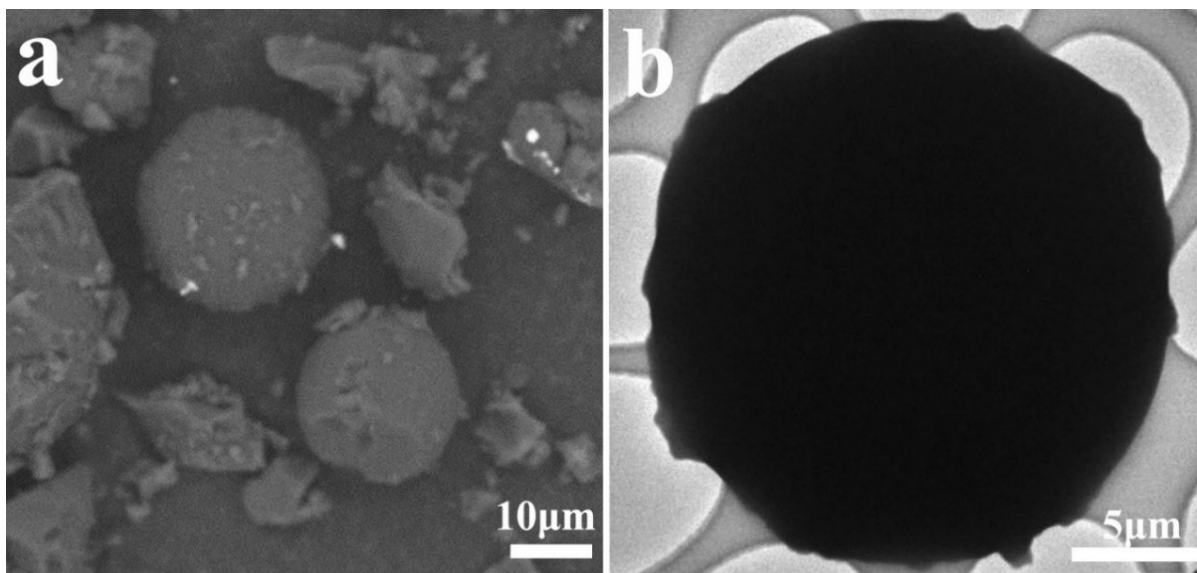

**Fig. S7.** Structural analyses of catalyst. SEM image of precursor (a) and TEM image of precursor (b).

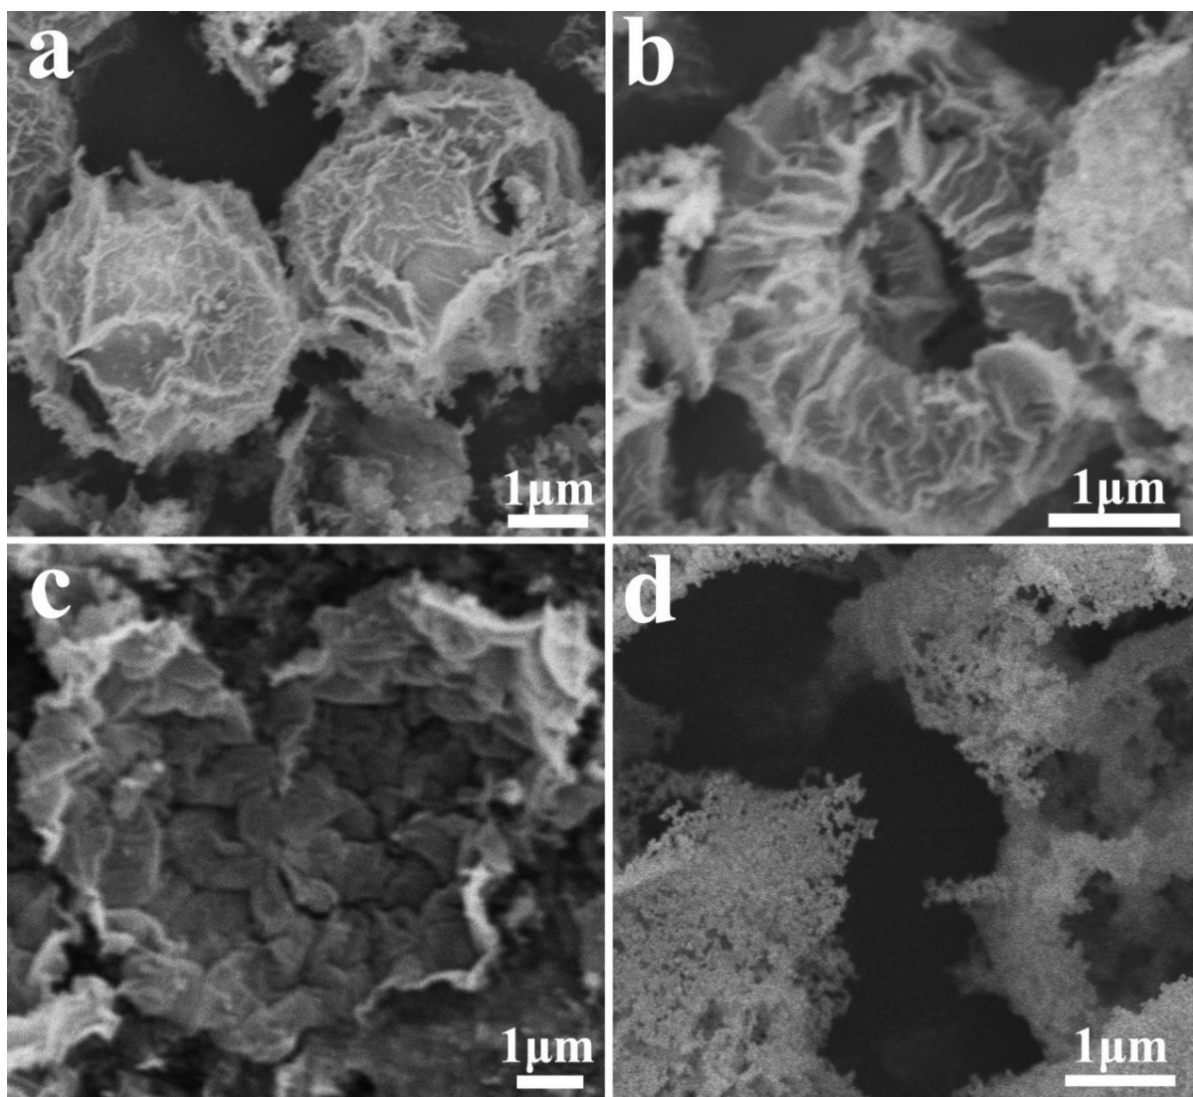

**Fig. S8.** Scanning electron microscopy (SEM) of  $\text{Co}_{\text{SA}}\text{-RuO}_2\text{-NUCN}$  with different oxidation time of 2h (a), 4h (b), 6h (c) and 8h (d).

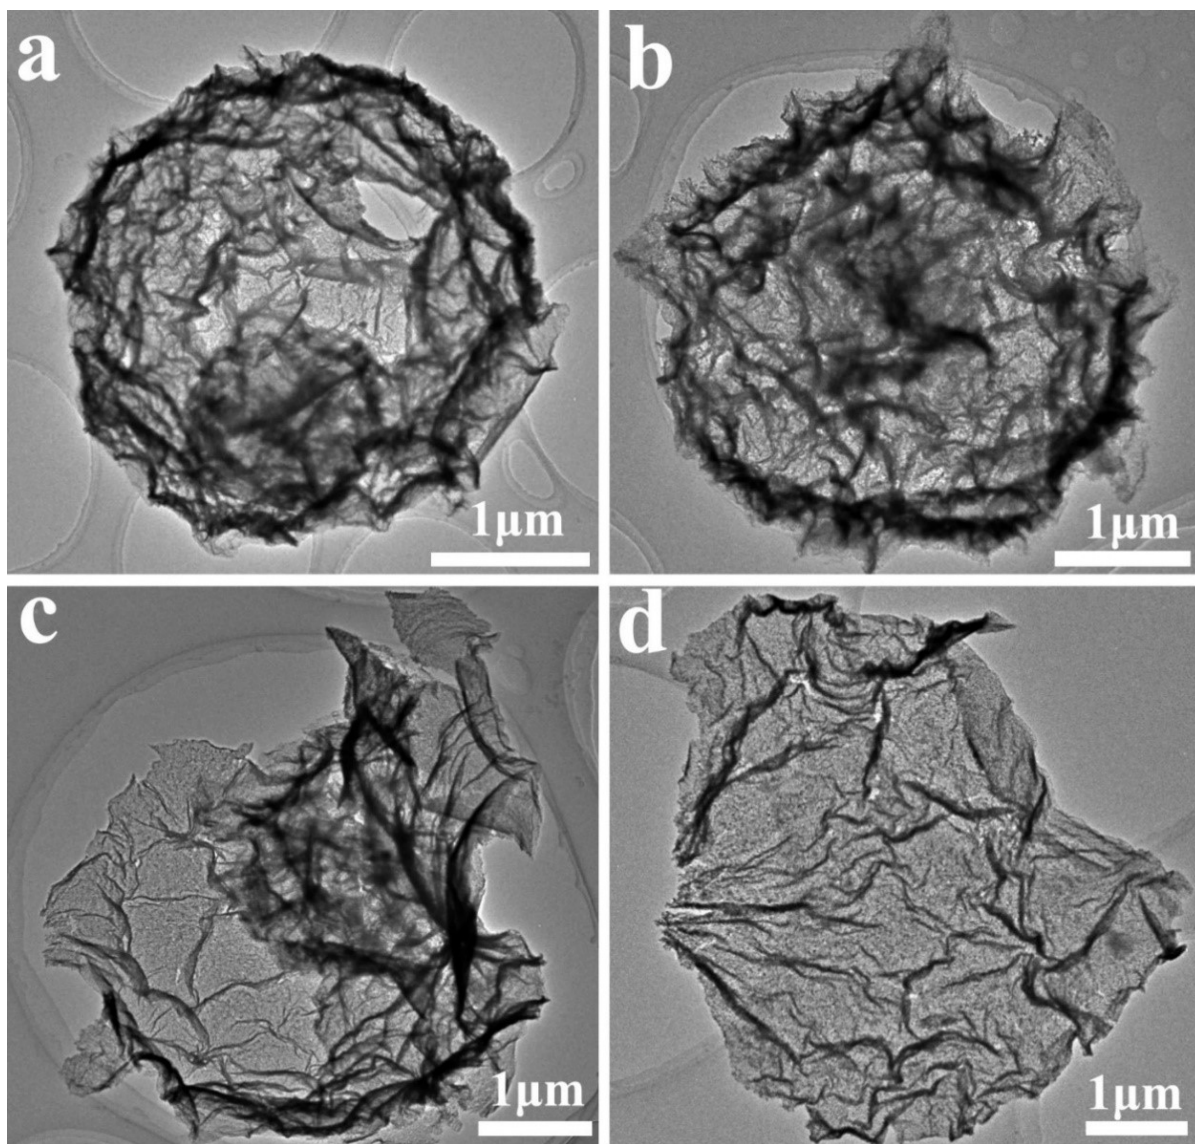

**Fig. S9.** Transmission electron microscope (TEM) of  $\text{Co}_{\text{SA}}\text{-RuO}_2\text{-NUCN}$  with different oxidation time of 2h (a), 4h (b), 6h (c) and 8h (d).



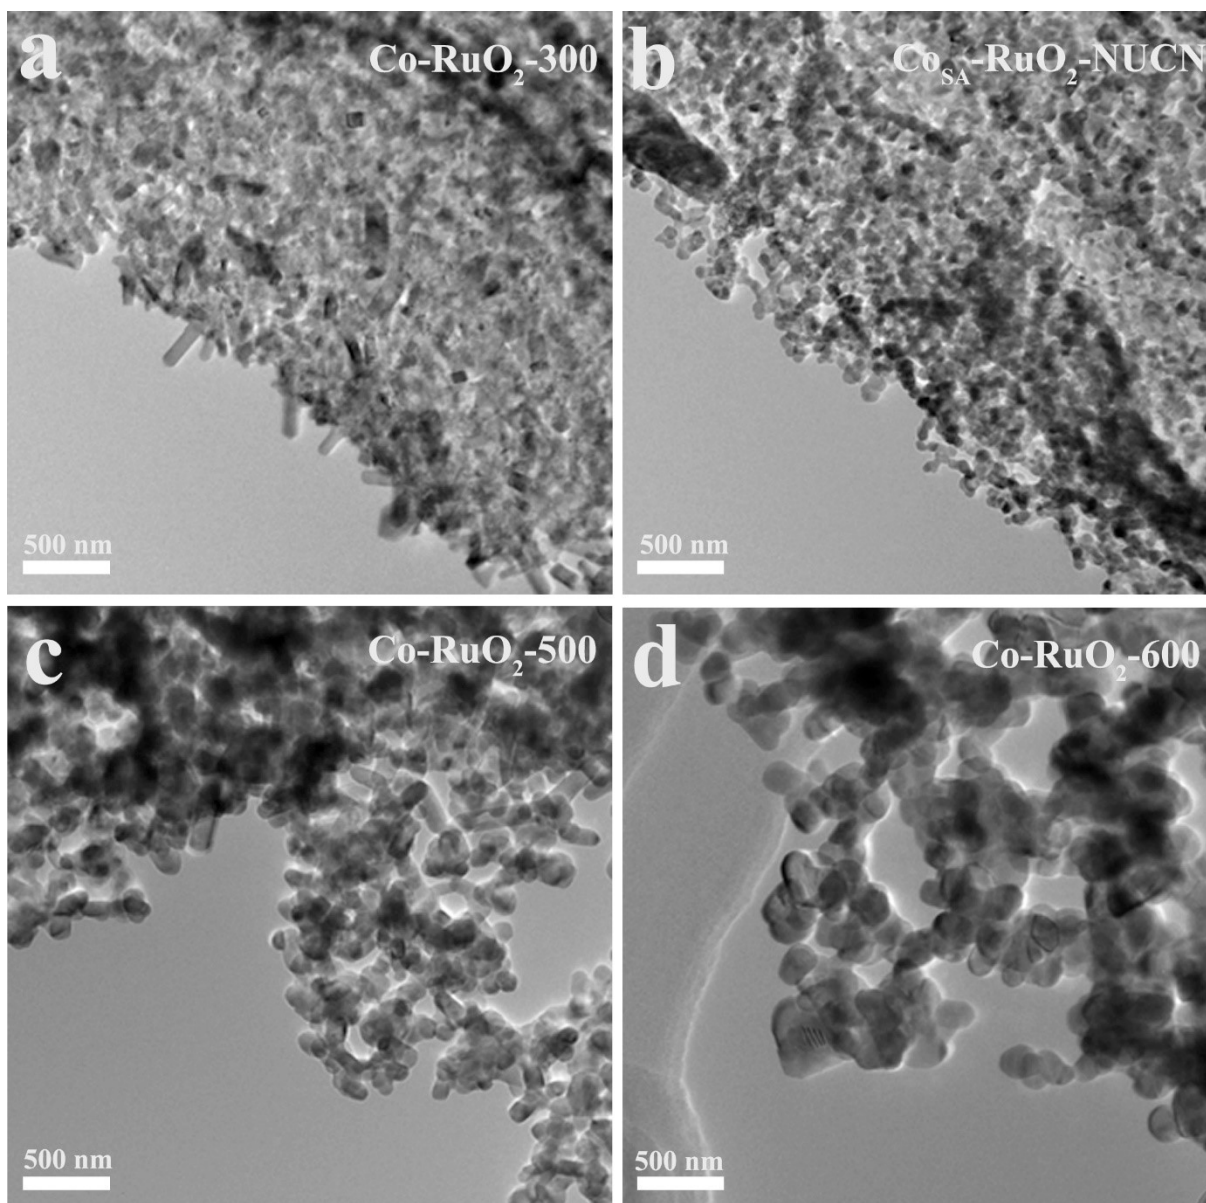

**Fig. S10.** Transmission electron microscope (TEM) of Co<sub>SA</sub>-RuO<sub>2</sub>-NUCN with different oxidation temperature of 300°C (a), 400°C (b), 500°C (c) and 600°C (d).

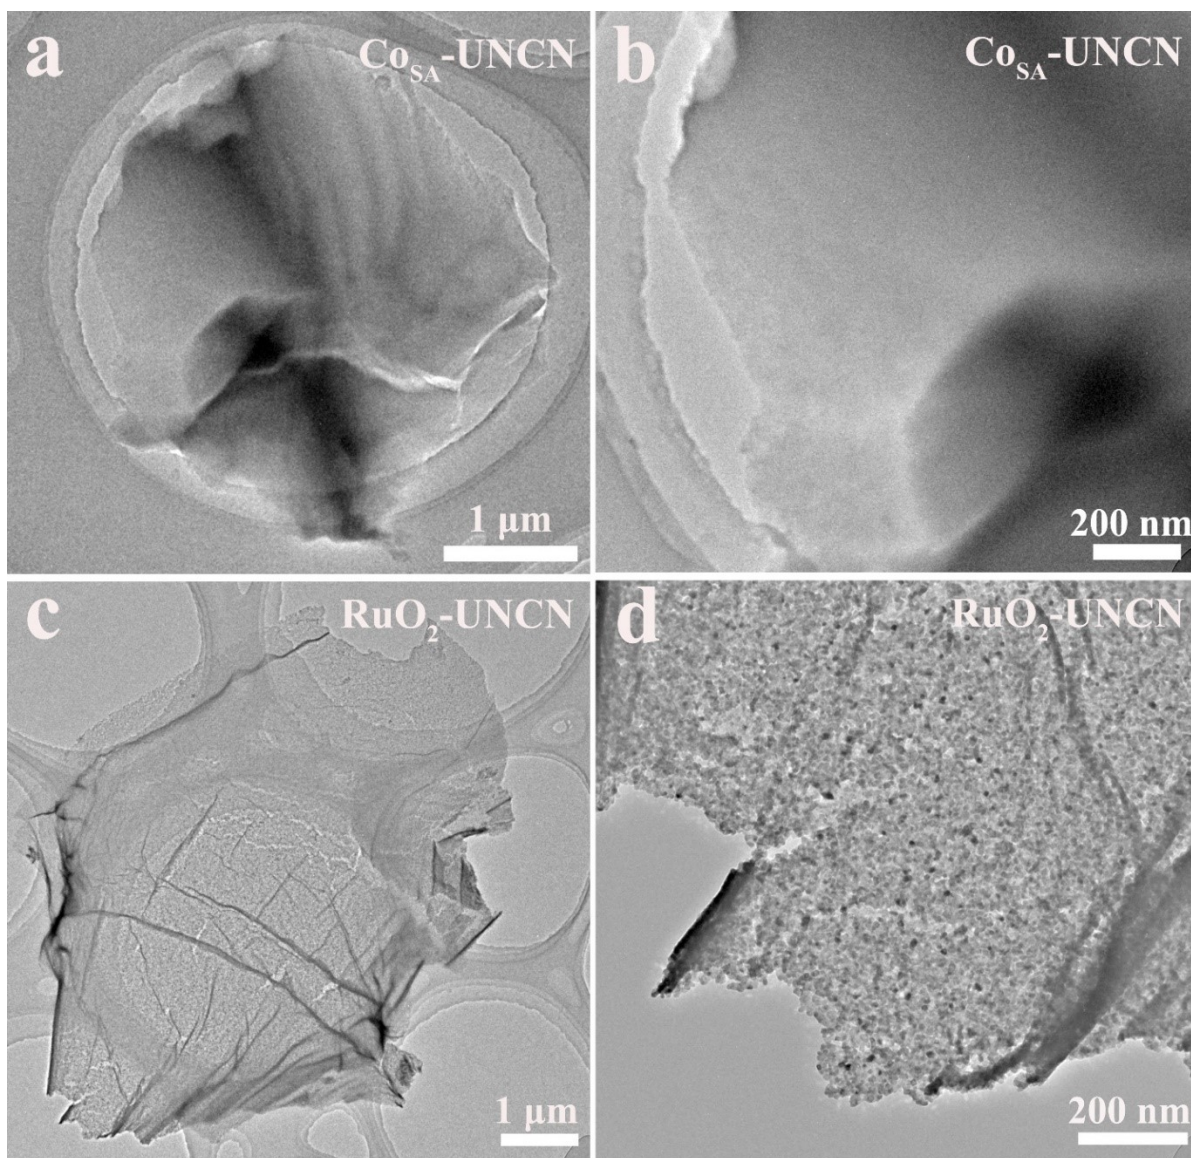

**Fig. S11.** Transmission electron microscope (TEM) of  $\text{Co}_{\text{SA}}\text{-UNCN}$  (a, b) and  $\text{RuO}_2\text{-UNCN}$  (c, d).

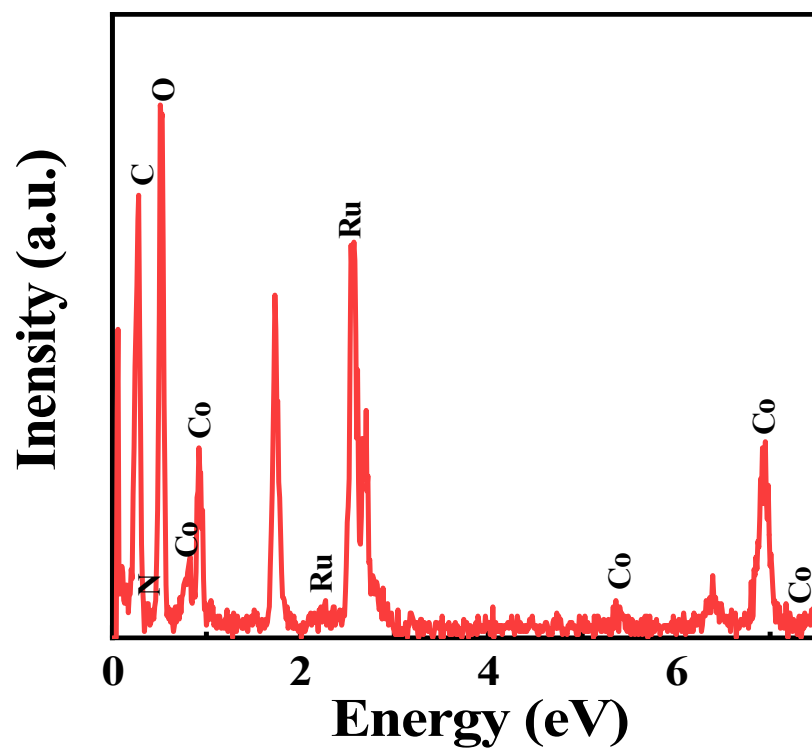

Fig. S12. EDS curve for elemental determination in  $\text{Co}_{\text{SA}}\text{-RuO}_2\text{-NUCN}$ .

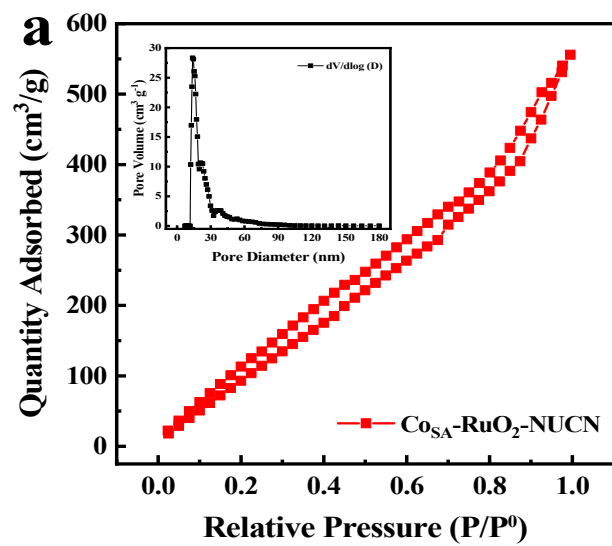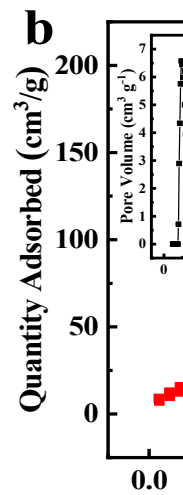

**Fig. S13.**  $\text{N}_2$  adsorption-desorption isotherms of  $\text{Co}_{\text{SA}}\text{-RuO}_2\text{-NUCN}$  (a) and  $\text{RuO}_2\text{-NUCN}$  (b).

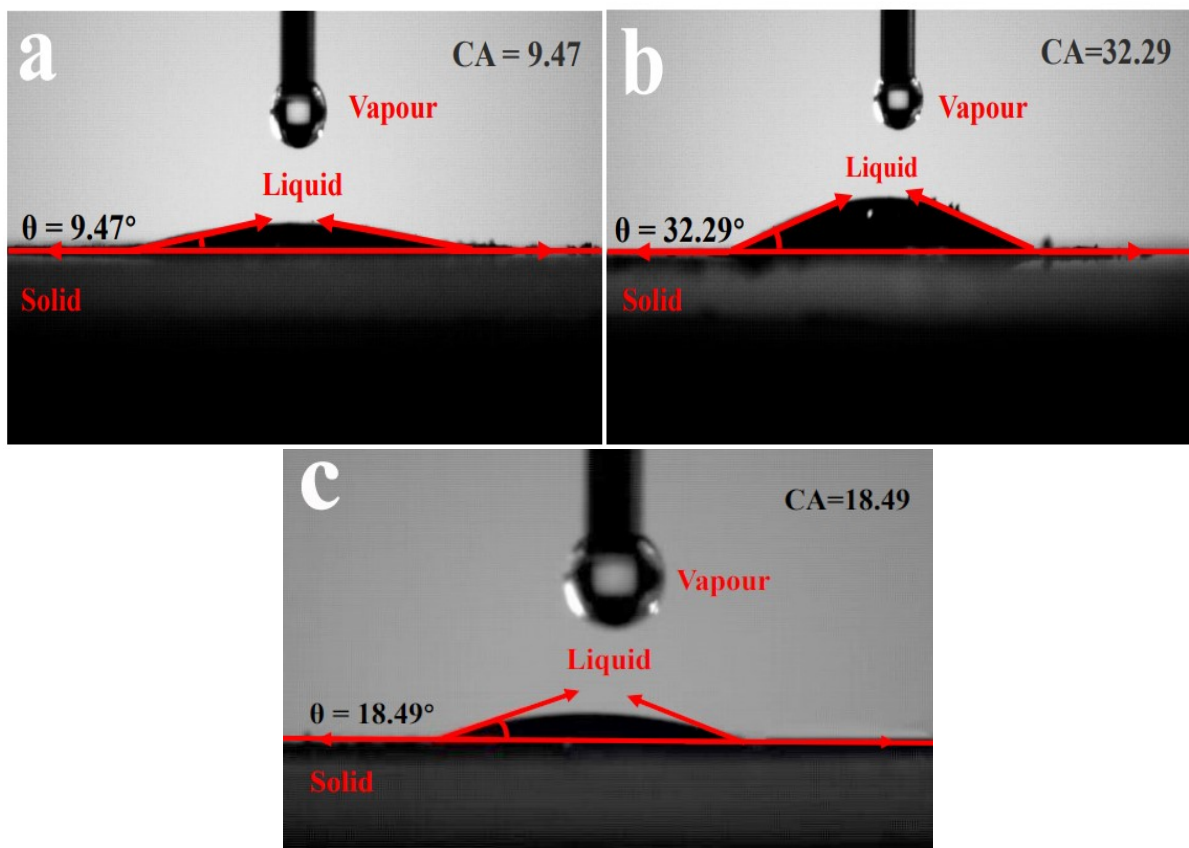

**Fig. S14.** Contact angles of  $\text{Co}_{\text{SA}}\text{-RuO}_2\text{-NUCN}$  (a);  $\text{RuO}_2\text{-NUCN}$  (b) and  $\text{Co}_{\text{SA}}\text{-NUCN}$  (c).

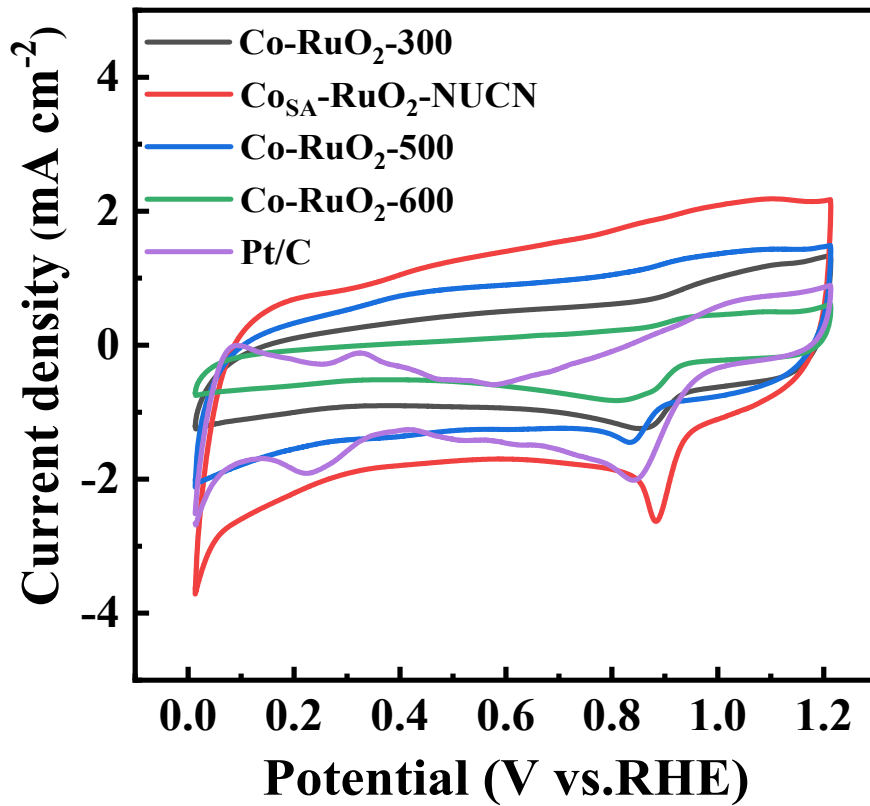

**Fig. S15.** CV curves for Co-RuO<sub>2</sub>-300, Co<sub>SA</sub>-RuO<sub>2</sub>-NUCN, Co-RuO<sub>2</sub>-500, Co-RuO<sub>2</sub>-600 and Pt/C in 0.1 M KOH electrolyte at 10 mV s<sup>-1</sup>.

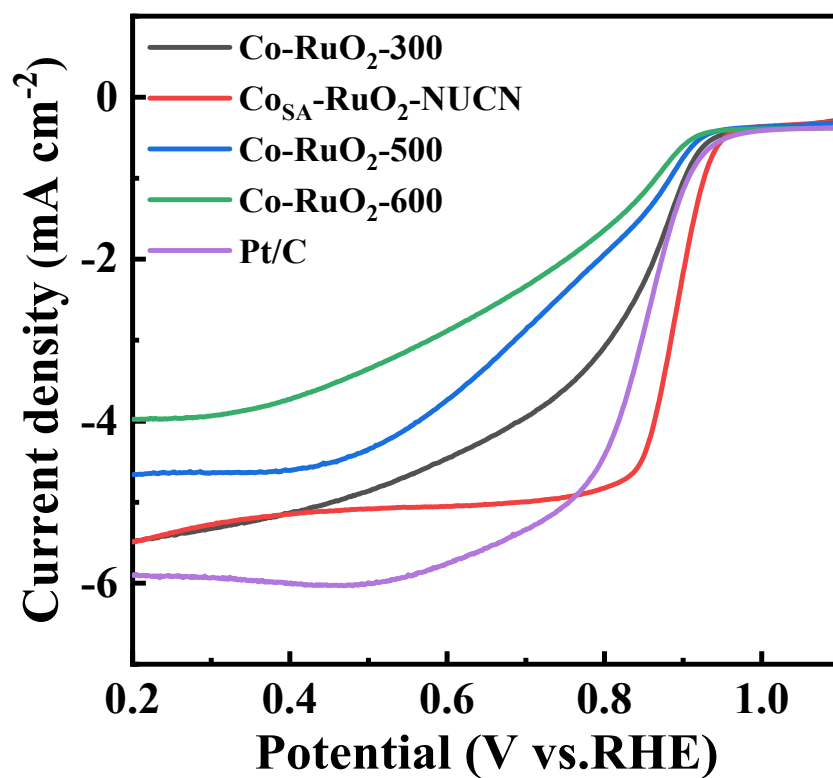

**Fig. S16.** LSV curves of Co-RuO<sub>2</sub>-300, Co<sub>SA</sub>-RuO<sub>2</sub>-NUCN, Co-RuO<sub>2</sub>-500, Co-RuO<sub>2</sub>-600 and Pt/C in an O<sub>2</sub>-saturated 0.1 M KOH solution at a scan rate of 5 mV s<sup>-1</sup>.

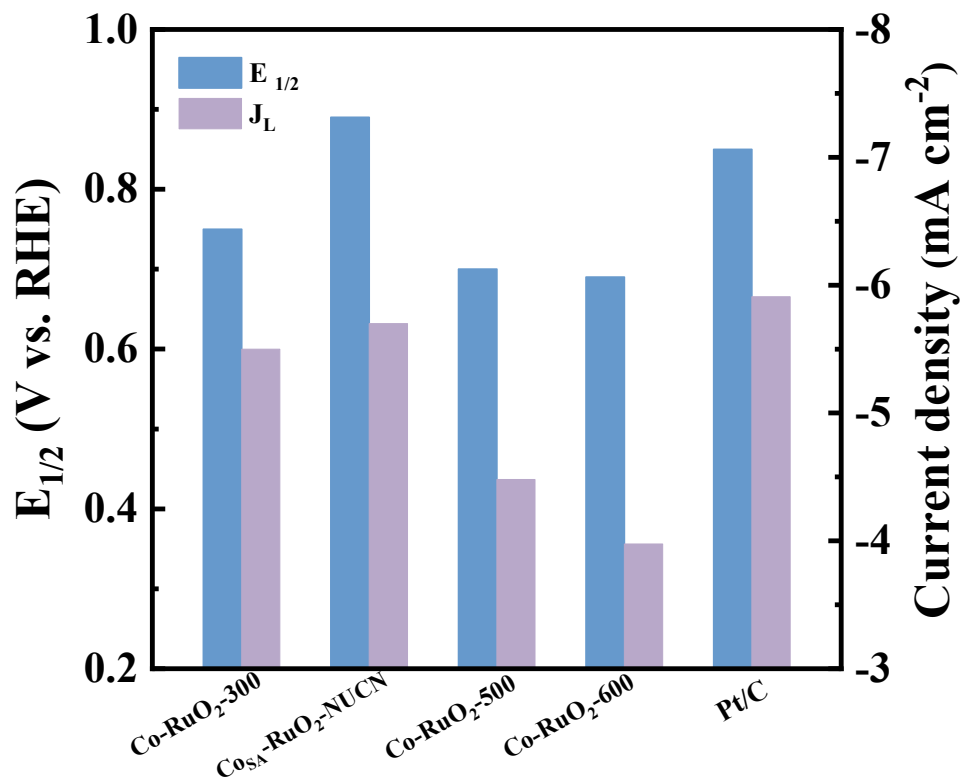

**Fig. S17.** Kinetic current densities and half wave potentials of Co-RuO<sub>2</sub>-300, Co<sub>SA</sub>-RuO<sub>2</sub>-NUCN, Co-RuO<sub>2</sub>-500, Co-RuO<sub>2</sub>-600 and Pt/C.



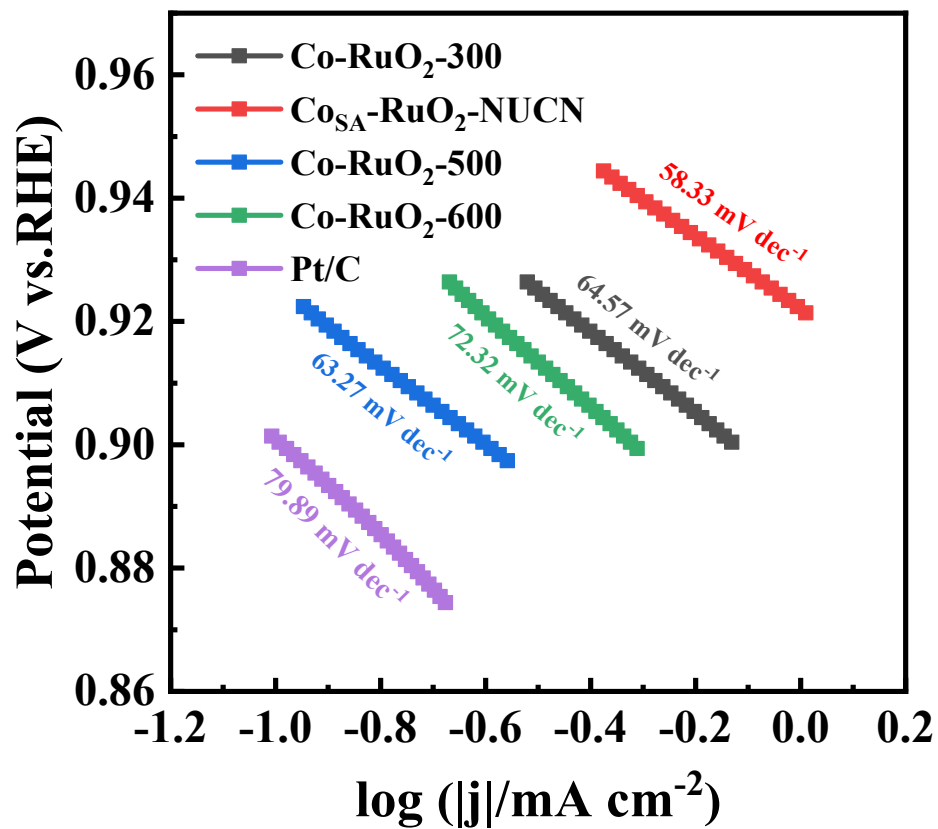

**Fig. S18.** Tafel plots of Tafel plots of the  $\text{Co-RuO}_2\text{-300}$ ,  $\text{Co}_{\text{SA}}\text{-RuO}_2\text{-NUCN}$ ,  $\text{Co-RuO}_2\text{-500}$ ,  $\text{Co-RuO}_2\text{-600}$  and  $\text{Pt/C}$  in 0.1 M KOH solution.

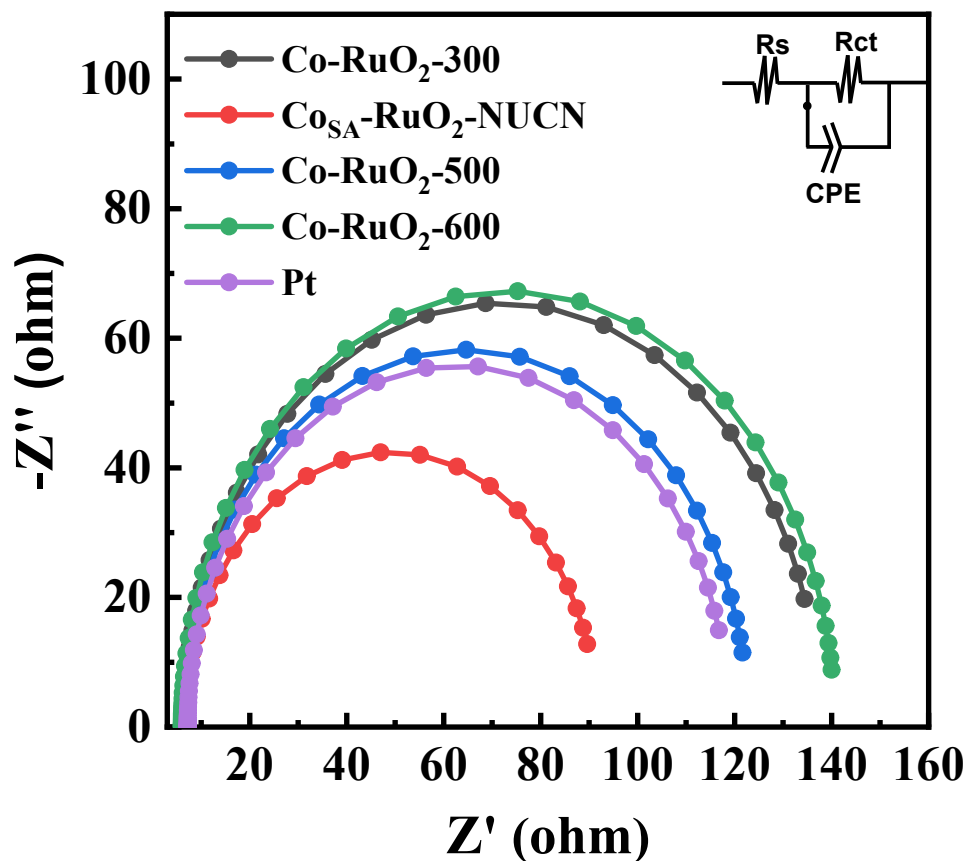

**Fig. S19.** Nyquist curves of Co-RuO<sub>2</sub>-300, Co<sub>SA</sub>-RuO<sub>2</sub>-NUCN, Co-RuO<sub>2</sub>-500, Co-RuO<sub>2</sub>-600 and Pt/C in an O<sub>2</sub>-saturated 0.1 M KOH solution at an amplitude of 5 mV with a rotation rate of 1600 rpm for ORR.

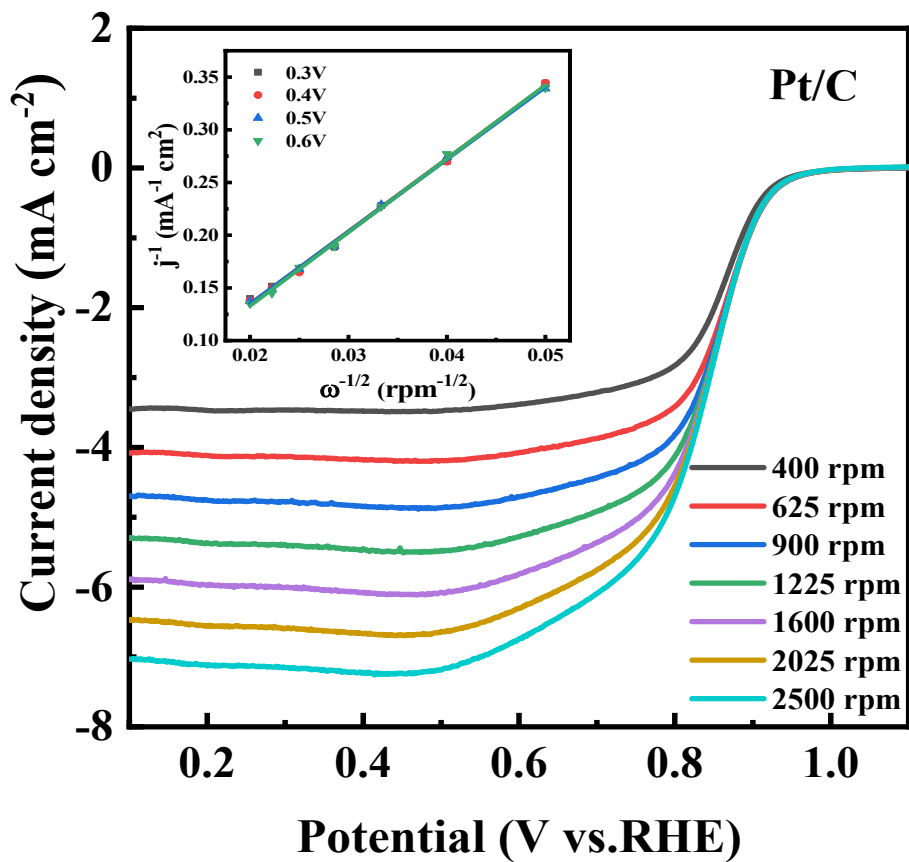

**Fig. S20.** LSV curves and calculated K-L plots (inset) of Pt/C at different potentials in an O<sub>2</sub>-saturated 0.1 M KOH at different RDE rotation rates (5 mV s<sup>-1</sup>).

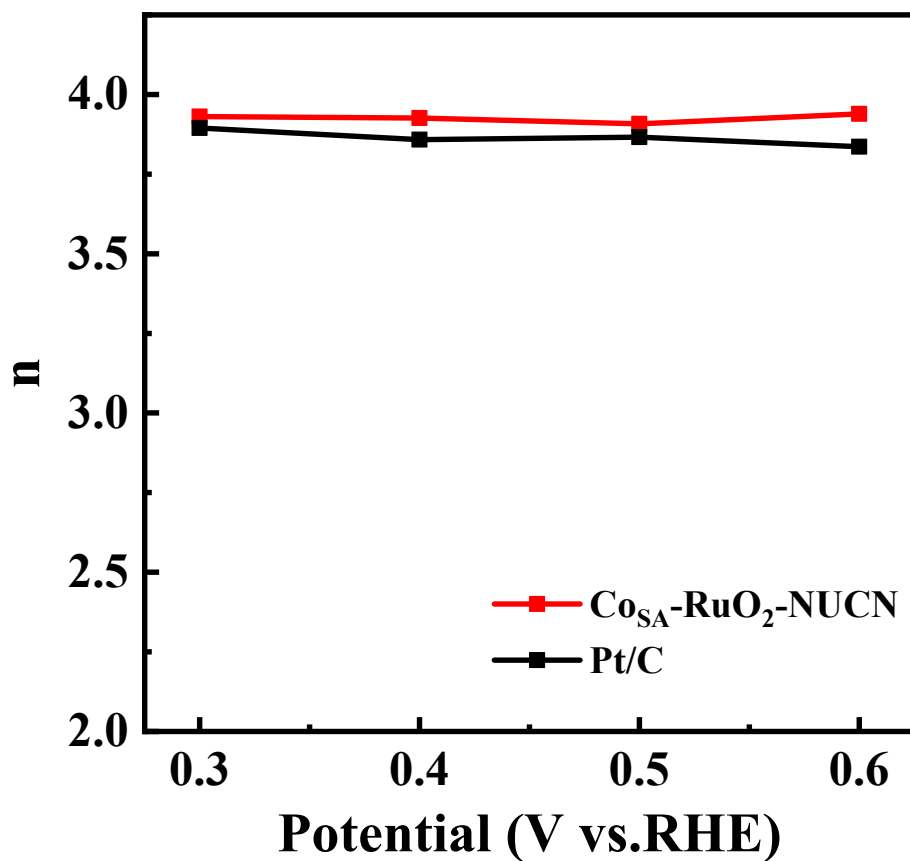

Fig. S21. Electron-transfer number (n) derived from K-L plots at different potentials.

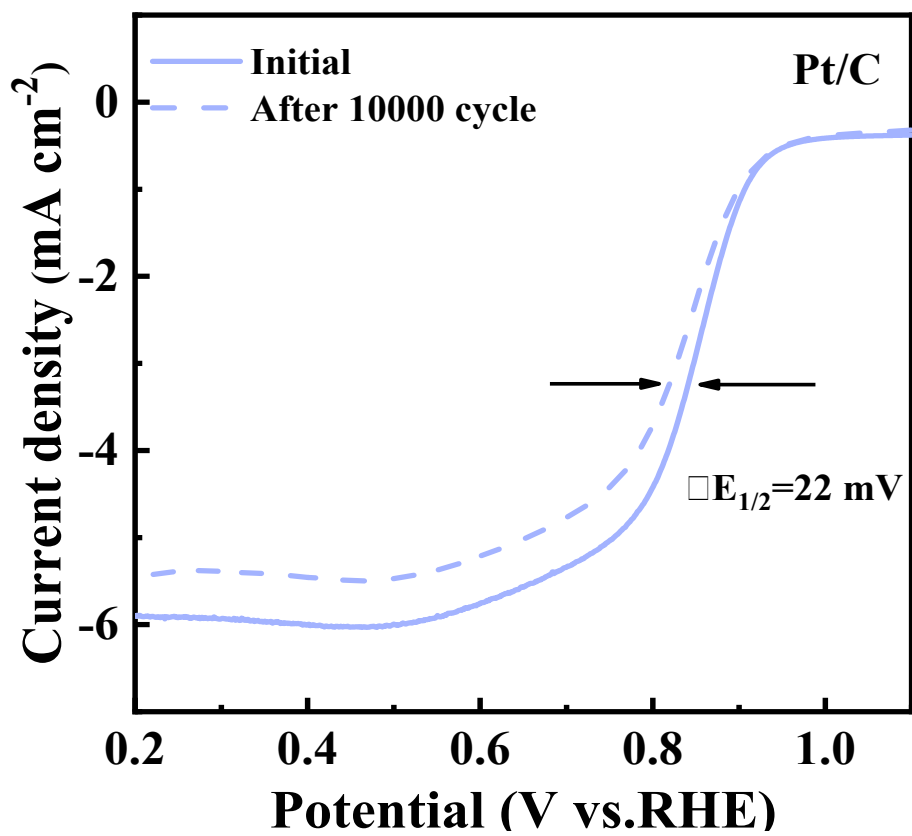

**Fig. S22.** ORR polarization curves of Pt/C before and after the continuous operation in the O<sub>2</sub>-saturated 0.1 M KOH at 1600 rpm.

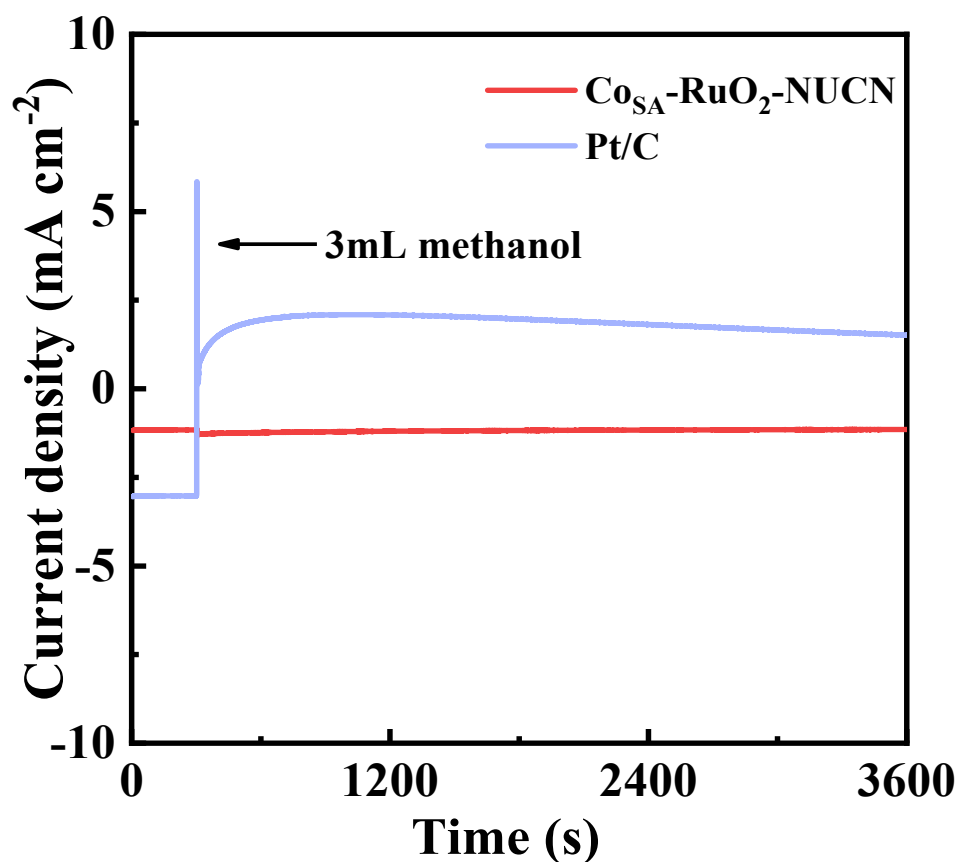

**Fig. S23.** Chronoamperometric (i-t) responses of Co<sub>SA</sub>-RuO<sub>2</sub>-NUCN and Pt/C after the addition of 1 M methanol in an O<sub>2</sub>-saturated 0.1 M KOH at 1600 rpm.

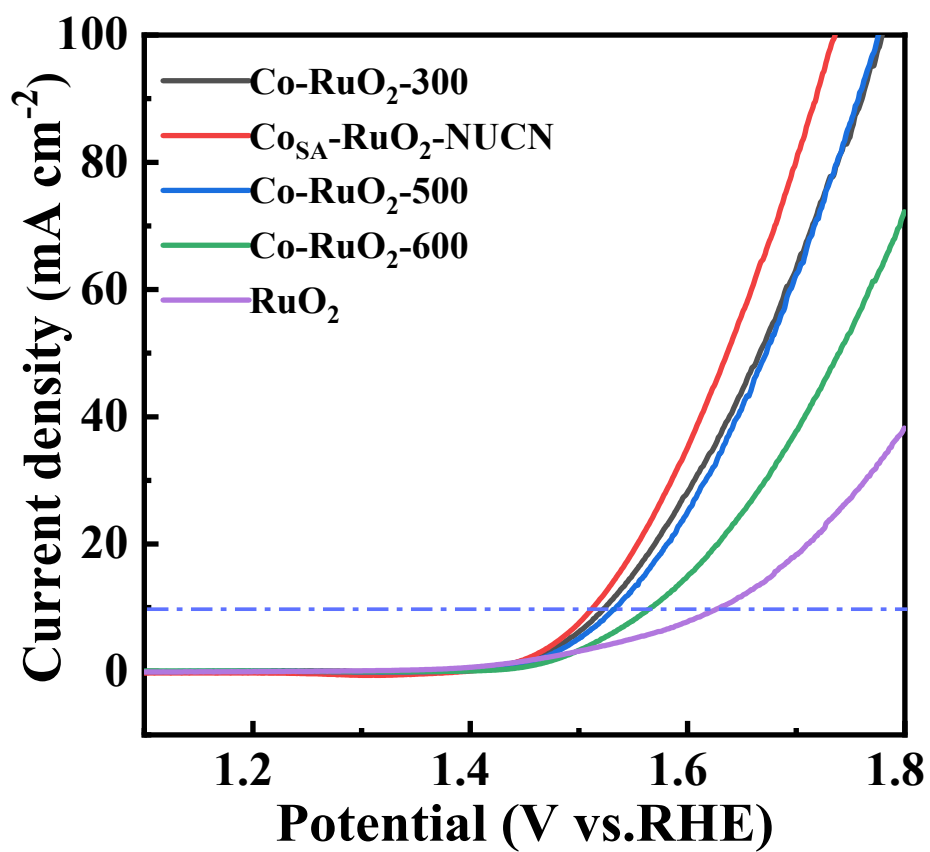

**Fig. S24.** LSV curves of Co-RuO<sub>2</sub>-300, Co<sub>SA</sub>-RuO<sub>2</sub>-NUCN, Co-RuO<sub>2</sub>-500, Co-RuO<sub>2</sub>-600 and RuO<sub>2</sub> in an O<sub>2</sub>-saturated 0.1 M KOH solution at a scan rate of 2 mV s<sup>-1</sup> and 1600 rpm.

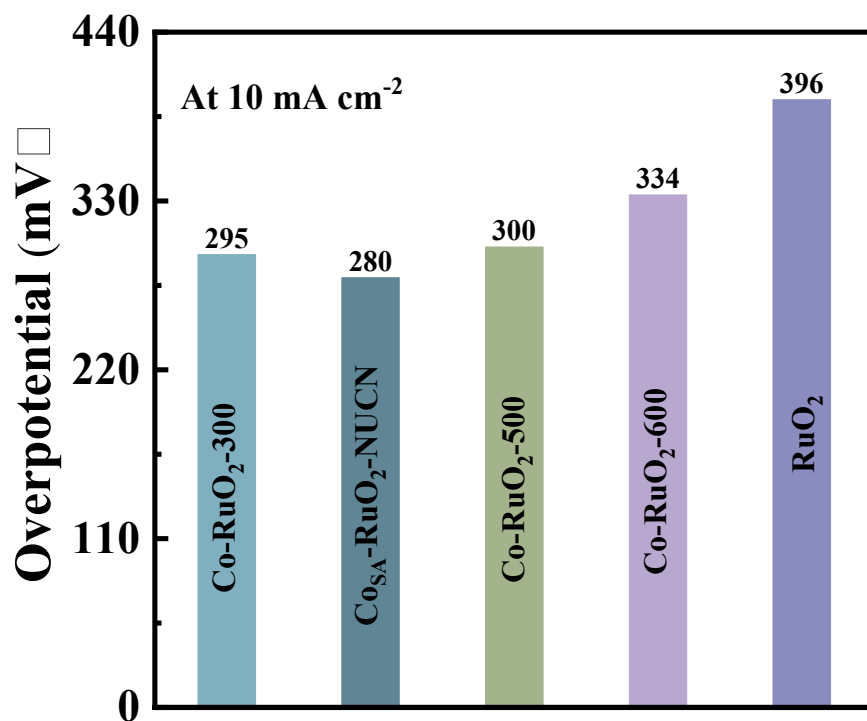

**Fig. S25.** The corresponding overpotential of Co-RuO<sub>2</sub>-300, Co<sub>SA</sub>-RuO<sub>2</sub>-NUCN, Co-RuO<sub>2</sub>-500, Co-RuO<sub>2</sub>-600 and RuO<sub>2</sub> in 0.1 M KOH solution.



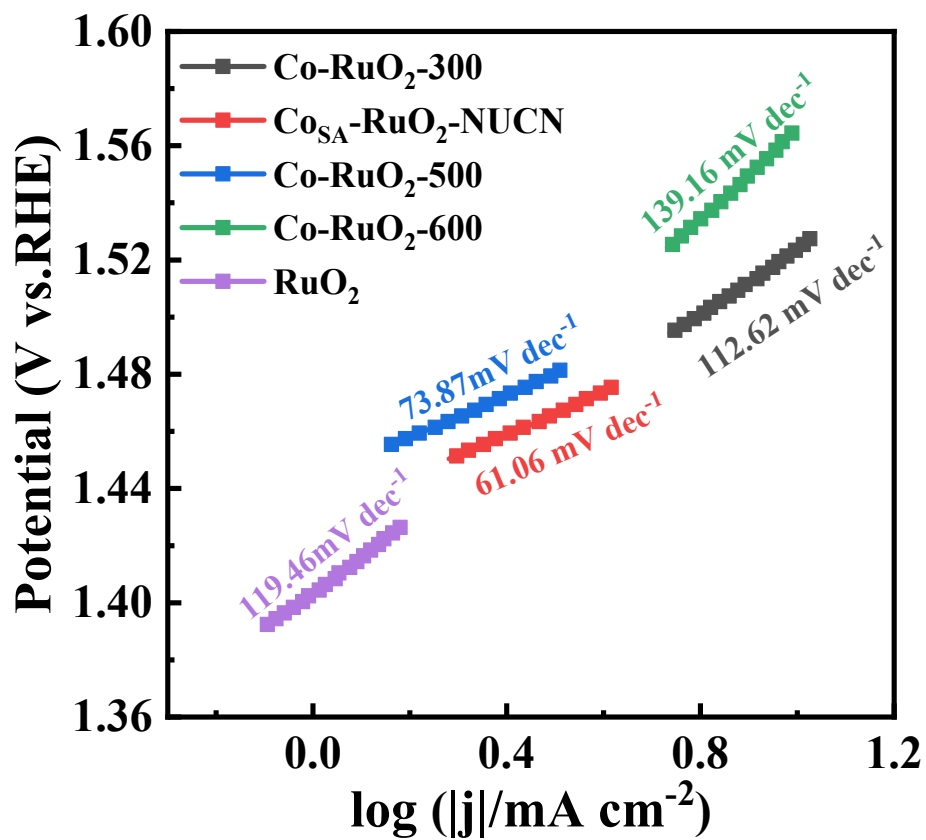

**Fig. S26.** Tafel plots of Co-RuO<sub>2</sub>-300, Co<sub>SA</sub>-RuO<sub>2</sub>-NUCN, Co-RuO<sub>2</sub>-500, Co-RuO<sub>2</sub>-600 and RuO<sub>2</sub> in 0.1 M KOH solution.

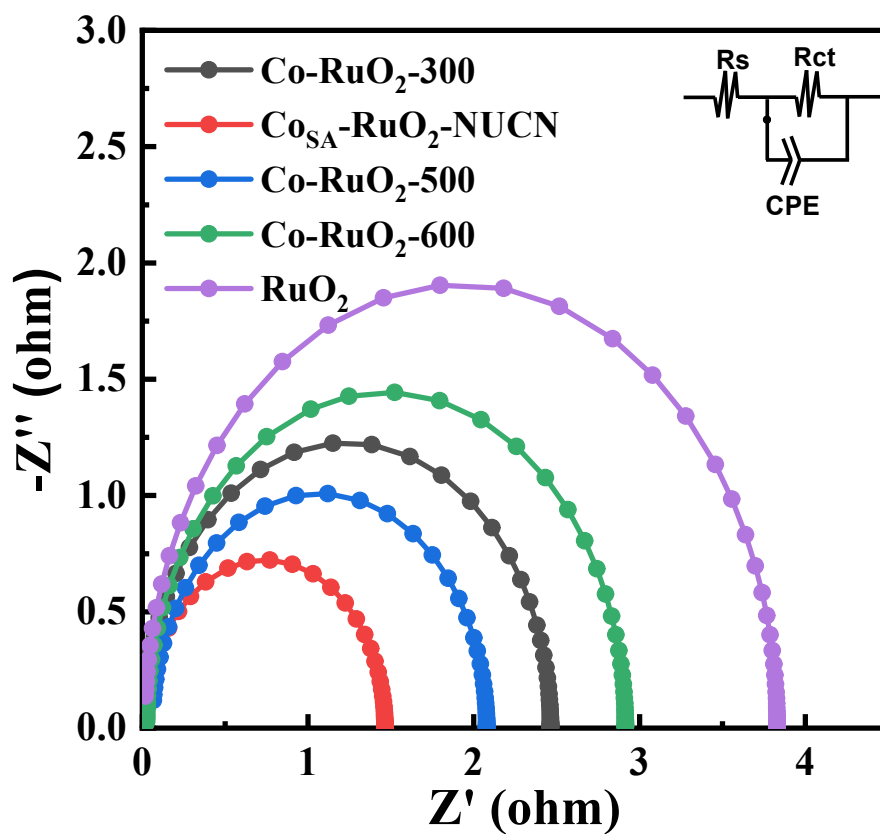

**Fig. S27.** Nyquist curves of  $\text{Co-RuO}_2\text{-300}$ ,  $\text{Co}_{\text{SA}}\text{-RuO}_2\text{-NUCN}$ ,  $\text{Co-RuO}_2\text{-500}$ ,  $\text{Co-RuO}_2\text{-600}$  and  $\text{RuO}_2$  in an  $\text{O}_2$ -saturated 0.1 M KOH solution at an amplitude of 5 mV with a rotation rate of 1600 rpm for OER.

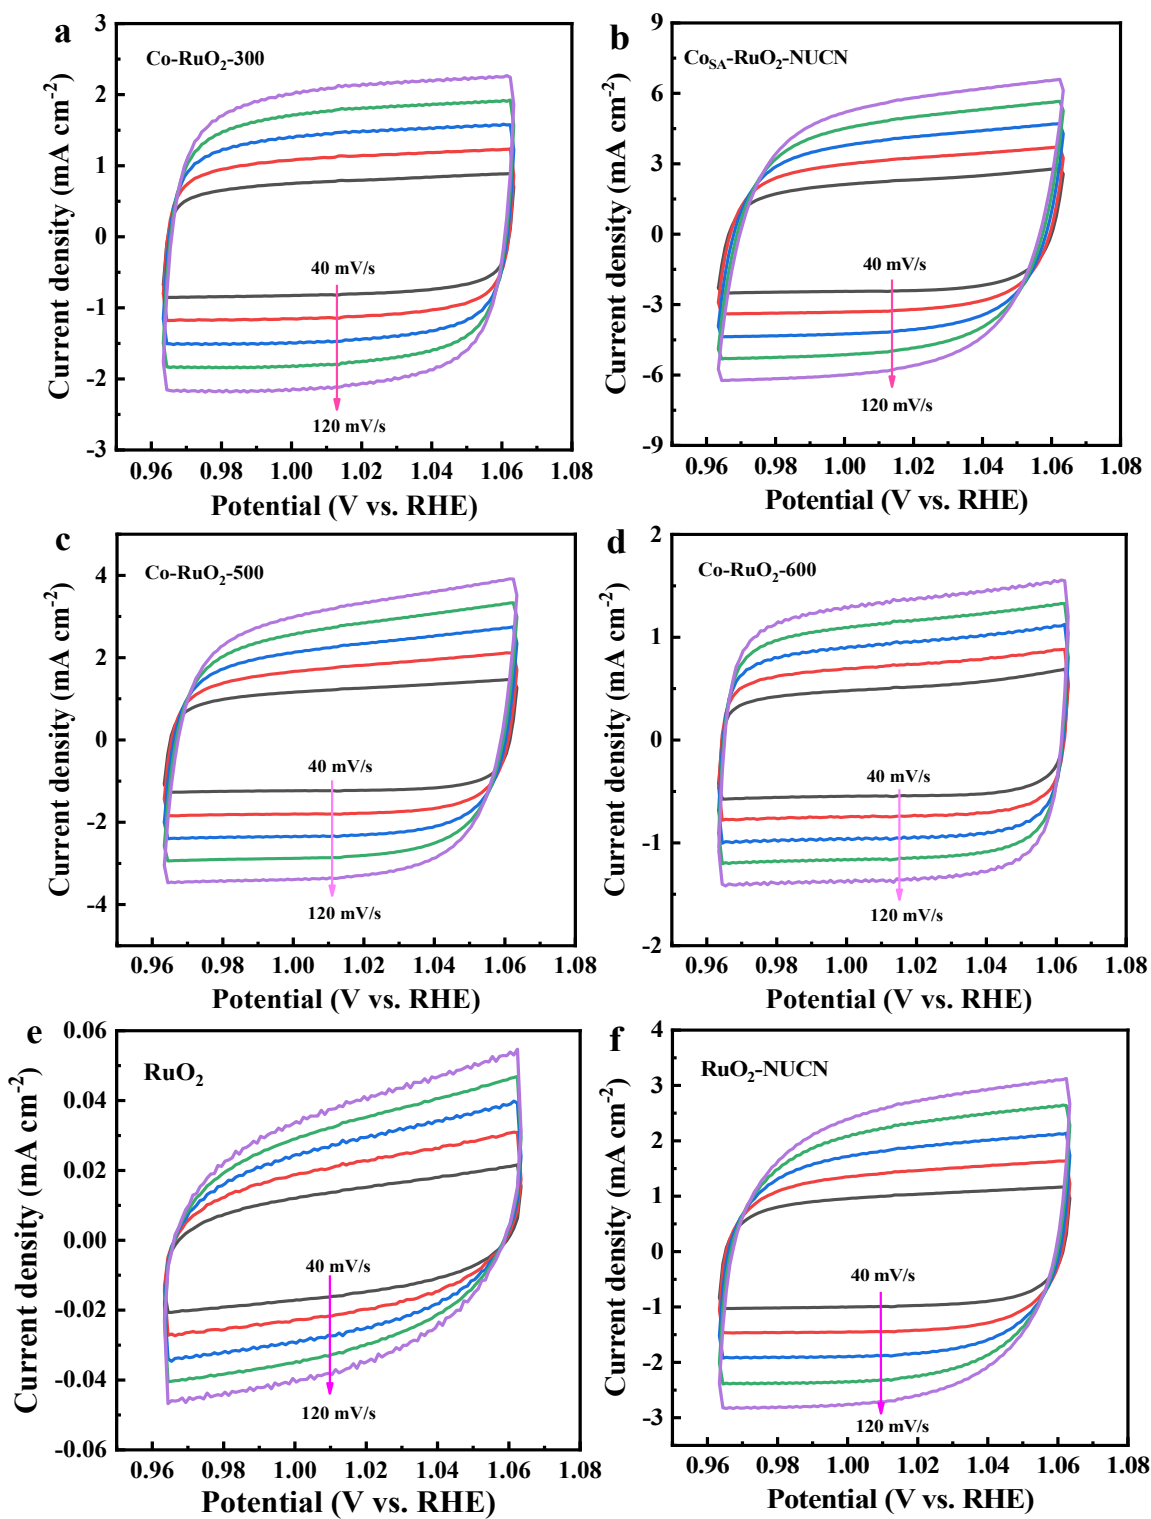

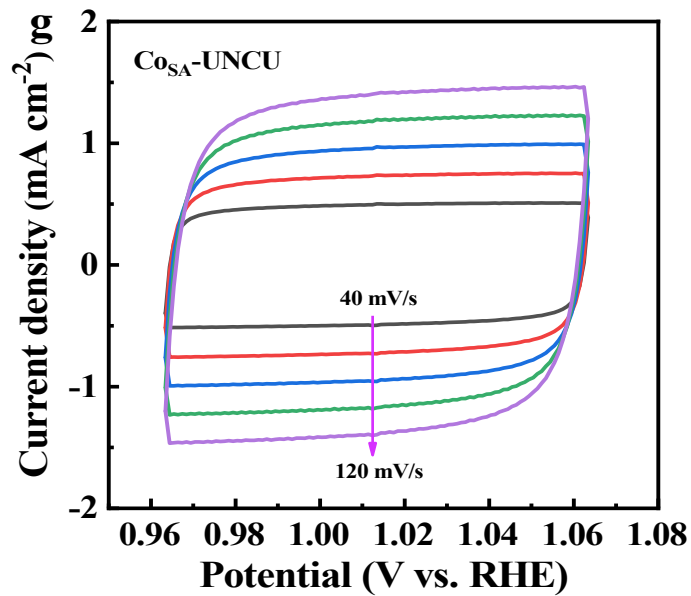

**Fig. S28.** CV curves of Co-RuO<sub>2</sub>-300 (a), Co<sub>SA</sub>-RuO<sub>2</sub>-NUCN (b), Co-RuO<sub>2</sub>-500 (c), Co-RuO<sub>2</sub>-600 (d), RuO<sub>2</sub> (e), RuO<sub>2</sub>-NUCN (f) and Co<sub>SA</sub>-NUCN (g) in 0.1 M KOH electrolyte at different scan rates.

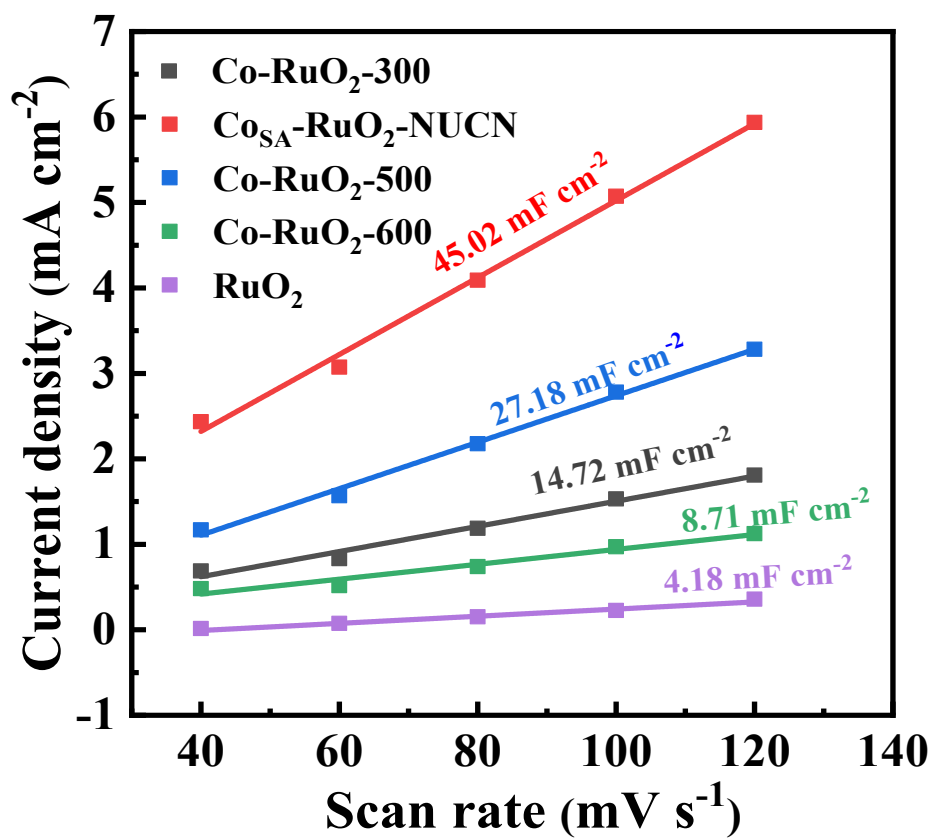

**Fig. S29.** Linear plots of scan rates vs. current density for Co-RuO<sub>2</sub>-300, Co<sub>SA</sub>-RuO<sub>2</sub>-NUCN, Co-RuO<sub>2</sub>-500, Co-RuO<sub>2</sub>-600 and RuO<sub>2</sub> in 0.1 M KOH electrolyte.

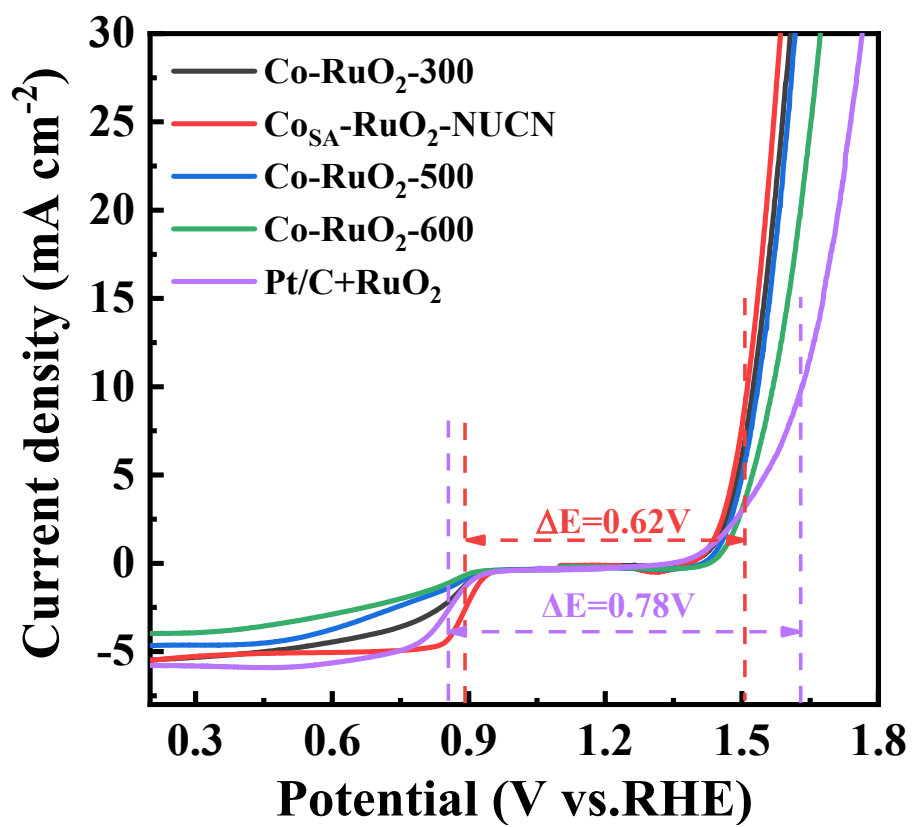

**Fig. S30.** ORR/OER polarization curves of Co-RuO<sub>2</sub>-300, Co<sub>SA</sub>-RuO<sub>2</sub>-NUCN, Co-RuO<sub>2</sub>-500, Co-RuO<sub>2</sub>-600 and Pt/C+RuO<sub>2</sub>.

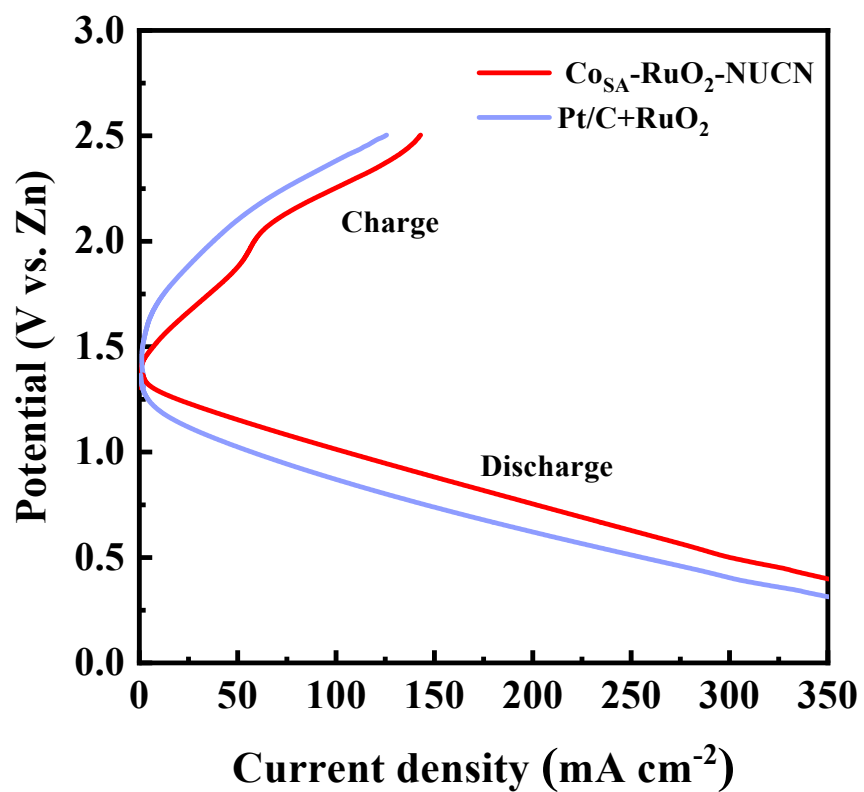

**Fig. S31.** Discharge and charge polarization curves of ZAB cells with Co<sub>SA</sub>-RuO<sub>2</sub>-NUCN and Pt/C+RuO<sub>2</sub> mixture cathodes.

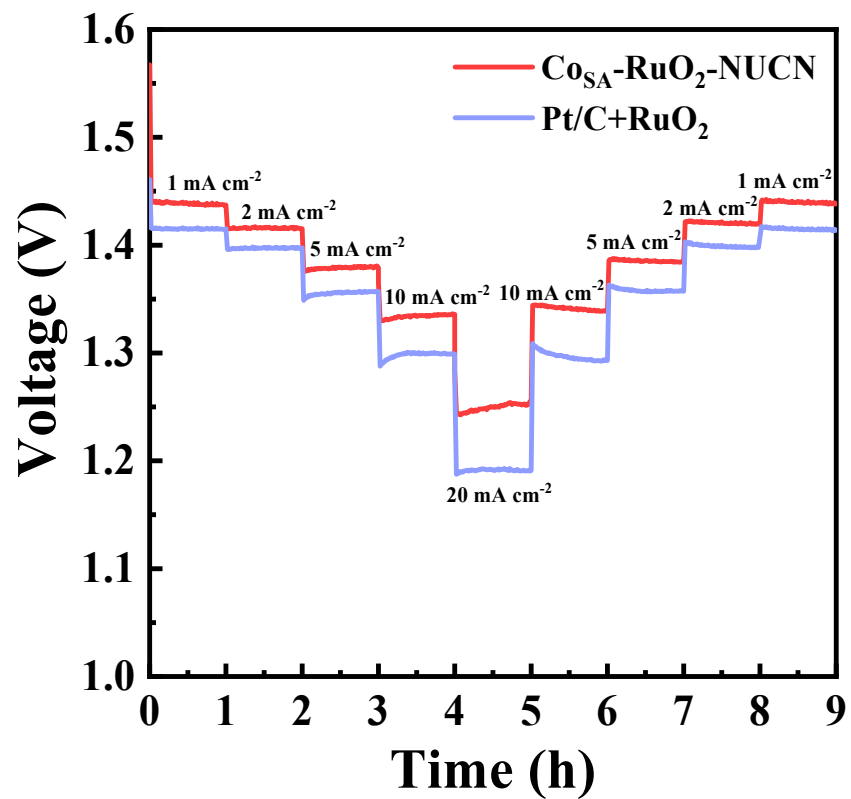

**Fig. S32.** Discharge curves at various discharge current densities of  $\text{Co}_{\text{SA}}\text{-RuO}_2\text{-NUCN}$  and  $\text{Pt/C+RuO}_2$  mixture cathodes.



**Table S1.** EXAFS fitting parameters at the Co *K*-edge for various samples ( $S_0^2=0.743$ )

| Sample                                       | Shell   | CN <sup>a</sup> | R(Å) <sup>b</sup> | $\sigma^2(\text{Å}^2)$ <sup>c</sup> | $\Delta E_0(\text{eV})$ <sup>d</sup> | R factor |
|----------------------------------------------|---------|-----------------|-------------------|-------------------------------------|--------------------------------------|----------|
| Co foil                                      | Co-Co   | 12*             | 2.494±0.0<br>01   | 0.0064±0.000<br>2                   | 7.9±0.3                              | 0.0017   |
| CoO                                          | Co-O    | 6.0±0.3         | 2.108±0.0<br>16   | 0.0103±0.002<br>1                   | -1.1±6.6                             | 0.0051   |
|                                              | Co-Co   | 11.7±0.5        | 3.007±0.0<br>08   | 0.0087±0.000<br>9                   | 1.7±1.4                              |          |
|                                              | Co-O    | 5.9±0.5         | 1.916±0.0<br>07   | 0.0033±0.000<br>7                   | 3.9±1.2                              |          |
| Co <sub>3</sub> O <sub>4</sub>               | Co-Co   | 5.9±0.5         | 2.855±0.0<br>05   | 0.0048±0.000<br>4                   | 2.0±0.8                              | 0.0072   |
|                                              | Co-Co   | 7.4±0.7         | 3.357±0.0<br>06   |                                     |                                      |          |
| Co <sub>SA</sub> -RuO <sub>2</sub> -<br>NUCN | Co-O    | 6.2±0.8         | 1.903±0.0<br>10   | 0.0063±0.001<br>3                   | -1.4±2.1                             | 0.0105   |
|                                              | Co-O-Ru | 3.1±0.8         | 3.344±0.0<br>17   | 0.0047±0.001<br>8                   | 6.6±2.6                              |          |

<sup>a</sup>CN, coordination number; <sup>b</sup>R, the distance to the neighboring atom; <sup>c</sup> $\sigma^2$ , the Mean Square Relative Displacement (MSRD); <sup>d</sup> $\Delta E_0$ , inner potential correction; R factor indicates the goodness of the fit.  $S_0^2$  was fixed to 0.743, according to the experimental EXAFS fit of Co foil by fixing CN as the known crystallographic value. \* This value was fixed during EXAFS fitting, based on the known structure of Co. Fitting range:  $3.0 \leq k (\text{Å}^{-1}) \leq 14.1$  and  $1.0 \leq R (\text{Å}) \leq 3.0$  (Co foil);  $3.0 \leq k (\text{Å}^{-1}) \leq 12.0$  and  $1.0 \leq R (\text{Å}) \leq 4.0$  (mxn-1-1). A reasonable range of EXAFS fitting parameters:  $0.700 < S_0^2 < 1.000$ ;  $CN > 0$ ;  $\sigma^2 > 0 \text{ Å}^2$ ;  $|\Delta E_0| < 10 \text{ eV}$ ;  $R \text{ factor} < 0.02$ .

**Table S2.** Cobalt content of Co<sub>SA</sub>-RuO<sub>2</sub>-NUCN.

| <b>Samples</b>                           | <b>Co (mas.%) from ICP-OES</b> |
|------------------------------------------|--------------------------------|
| Co <sub>SA</sub> -RuO <sub>2</sub> -NUCN | 0.46                           |

**Table S3.** Comparison of the E gap values, OER overpotential and mass activity of Co<sub>SA</sub>-RuO<sub>2</sub>-NUCN with state-of-the-art bifunctional electrocatalysts.

| Electrocatalysts                                            | E <sub>gap</sub> (V) | OER Overpotential (mV) | Mass activity (A g <sup>-1</sup> ) | Reference                                              |
|-------------------------------------------------------------|----------------------|------------------------|------------------------------------|--------------------------------------------------------|
| <b>Co<sub>SA</sub>-RuO<sub>2</sub>-NUCN</b>                 | <b>0.62</b>          | <b>280</b>             | <b>66.67 ± 0.01</b>                | <b>This work</b>                                       |
| <b>BrHT@CoNC</b>                                            | 0.6                  | 254                    | -                                  | <i>J. Mater. Chem. A</i> <b>8</b> , 10865-10874 (2020) |
| <b>Co@N-C/PCNF</b>                                          | 0.67                 | 289                    | 4.76 ± 0.01                        | <i>Adv. Sci.</i> <b>8</b> , 2101438 (2021)             |
| <b>Co<sub>2</sub>Cu<sub>1</sub>-S</b>                       | 0.74                 | 331                    | 27.70 ± 0.01                       | <i>J. Mater. Chem. A</i> <b>9</b> , 18329-18337 (2021) |
| <b>Co<sub>3</sub>O<sub>4</sub>@Z67-N700@CeO<sub>2</sub></b> | 0.72                 | 370                    | -                                  | <i>J. Mater. Chem. A</i> <b>7</b> , 25853-25864 (2020) |
| <b>Co/Co-N-C</b>                                            | 0.76                 | 410                    | 21.78 ± 0.01                       | <i>J. Power Sources</i> <b>458</b> , 229339 (2021)     |
| <b>CoFe/SN-C</b>                                            | 0.66                 | 274                    | -                                  | <i>Appl. Catal., B</i> <b>269</b> , 118771 (2020)      |
| <b>Co/MnO@NC</b>                                            | 0.66                 | 260                    | 50.00 ± 0.01                       | <i>Energy Storage Mater.</i> <b>43</b> , 42-52 (2021)  |
| <b>CoP-NC@NFP</b>                                           | 0.72                 | 270                    | 2.85 ± 0.01                        | <i>Chem. Eng. J.</i> <b>428</b> , 131115 (2021)        |
| <b>CNT@SAC-Co/NCP</b>                                       | 0.74                 | 380                    | 100.00 ± 0.01                      | <i>Adv. Funct. Mater.</i> <b>31</b> , 2103360 (2021)   |
| <b>Mn-RuO<sub>2</sub></b>                                   | 0.64                 | 270                    | -                                  | <i>J. Am. Chem. Soc.</i> <b>144</b> , 2694-2704 (2022) |
| <b>Co,Nb-MoS<sub>2</sub>/TiO<sub>2</sub> HSs</b>            | 0.7                  | 340                    | -                                  | <i>Nano Energy</i> <b>82</b> , 105750 (2021)           |
| <b>Co/CNFs</b>                                              | 0.654                | 320                    | 33.33 ± 0.01                       | <i>Adv. Mater.</i> <b>31</b> , 1808043 (2019)          |

|                              |       |     |              |                                                            |
|------------------------------|-------|-----|--------------|------------------------------------------------------------|
| <b>NiFe-LDH<br/>Co,N-CNF</b> | 0.752 | 312 | 83.33 ± 0.01 | <i>Adv. Energy Mater.</i><br><b>7</b> , 1700467<br>(2017)  |
| <b>Co/Co-N-C</b>             | 0.72  | 310 | 10.00 ± 0.01 | <i>Adv. Mater.</i><br><b>31</b> , 1901666<br>(2019)        |
| <b>Co/N-C</b>                | 0.72  | 330 | 33.33 ± 0.01 | <i>Chem. Eng. J.</i><br><b>433</b> , 134500<br>(2022)      |
| <b>ODAC-CoO-30</b>           | 0.745 | 364 | -            | <i>Adv. Funct. Mater.</i><br><b>31</b> , 2101239<br>(2022) |

**Table S4.** Zn-air batteries performance of some previous literature of nonprecious metal or nonmetal catalysts.

| Air catalysts                               | Open circuit potential/ V | Power density /mW cm <sup>-2</sup> | Specific capacity /mAh g <sup>-1</sup> | Durability /h | Reference                                                          |
|---------------------------------------------|---------------------------|------------------------------------|----------------------------------------|---------------|--------------------------------------------------------------------|
| <b>Co<sub>SA</sub>-RuO<sub>2</sub>-NUCN</b> | <b>1.55</b>               | <b>156.6</b>                       | <b>766.15</b>                          | <b>800</b>    | <b>This work</b>                                                   |
| <b>CoNP@FeNC-0.05</b>                       | 1.51                      | 104.4                              | -                                      | 500           | <i>Nano-Micro Lett.</i> <b>14</b> ,162 (2022)                      |
| <b>Co(OH)<sub>2</sub>@NC</b>                | 1.45                      | 34.3                               | 798.3                                  | 85            | <i>Small</i> <b>17</b> , e2101720 (2021)                           |
| <b>FeS/Fe<sub>3</sub>C@NS-C-900</b>         | 1.455                     | 90.9                               | 750                                    | 865           | <i>ACS Appl. Mater. Interfaces.</i> <b>12</b> , 44710-44719 (2022) |
| <b>Co/CoS/Fe-HSNC-700</b>                   | 1.49                      | 213                                | 747                                    | 50            | <i>Appl. Catal., B</i> <b>268</b> , 118729 (2020)                  |
| <b>Co/MnO@NC</b>                            | 1.50                      | 146                                | 692                                    | 400           | <i>Chem. Eng. J.</i> <b>403</b> , 126385 (2020)                    |
| <b>Co@NCNR</b>                              | 1.54                      | 76.76                              | 726                                    | -             | <i>Energy Environ. Mater.</i> (2022)                               |
| <b>Co@IC/MoC@P C</b>                        | 1.395                     | 221                                | 728                                    | 100           | <i>ACS Nano</i> <b>15</b> , 13399-13414 (2021)                     |
| <b>Co@N-C700</b>                            | 1.41                      | 133                                | 712                                    | 240           | <i>Chem. Eng. J.</i> <b>421</b> , 129719 (2021)                    |
| <b>CNT@SAC-Co/NCP</b>                       | 1.45                      | 172                                | 864.8                                  | 210           | <i>Adv. Funct. Mater.</i> <b>31</b> , 2103360 (2021)               |
| <b>H-Co@FeCo/N/C</b>                        | 1.45                      | 125.2                              | -                                      | 200           | <i>Appl. Catal., B.</i> <b>278</b> , 119259 (2020)                 |
| <b>Cop@CoNC</b>                             | 1.46                      | 188.8                              | 791.4                                  | 360           | <i>Energy Storage Mater.</i> <b>46</b> , 553-562 (2022)            |

|                     |      |      |       |     |                                                              |
|---------------------|------|------|-------|-----|--------------------------------------------------------------|
| <b>Co@NiFe-LDH</b>  | 1.44 | 165  | 652   | 90  | <i>J. Mater. Chem. A</i><br><b>10</b> , 5244<br>(2022)       |
| <b>Co@hNCTs-800</b> | 1.45 | 149  | 746   | 500 | <i>Nano Energy</i><br><b>71</b> , 104592<br>(2020)           |
| <b>Co@LCO-NFs</b>   | 1.43 | 198  | 791   | 200 | <i>J. Mater. Chem. A</i><br><b>8</b> , 19946-19953<br>(2020) |
| <b>Co@NCW</b>       | 1.51 | 47.5 | 802.7 | 240 | <i>Appl. Catal., B</i><br><b>317</b> , 121758<br>(2022)      |

## References

1. X. Q. Wu, F. Y. Chen, N. Zhang, Y. M. Lei, Y. C. Jin, A. Qaseem and R. L. Johnston, *Small*, 2017, **13**, 1603387.
2. J. Liu, X. Meng, J. H. Xie, B. Liu, B. Tang, R. Y. Wang, C. Wang, P. Gu, Y. D. Song, S. C. Huo, and J. L. Zou, *Adv. Funct. Mater.*, 2023, **33**, 2300579.
3. R. Y. Wang, J. Liu, J. H. Xie, Z. Cai, Y. Yu, Z. X. Zhang, X. Meng, C. Wang, X. Q. Xu, J. L. Zou, *Appl. Catal., B*, 2023, **324**, 122230.
4. H. Jiang, J. Gu, X. Zheng, M. Liu, X. Qiu, L. Wang, W. Li, Z. Chen, X. Ji and J. Li., *Energy Environ. Sci.*, 2019, **12**, 322.
5. K. Liu, C. Zhang, Y. Sun, G. Zhang, X. Shen, F. Zou, H. Zhang, Z. Wu, E. Wegener, C. Taubert, J. Miller, Z. Peng and Y. Zhu, *ACS Nano*, 2018, **12**, 158-167.
6. G. He, M. Qiao, W. Li, T. Zhao, R. Zou, B. Li, J. Darr, J. Hu, M. Titirici and I. Parkin, *Adv. Sci.*, 2017, **4**, 1600214.
7. X. Han, W. Zhang, X. Ma, C. Zhong, N. Zhao, W. Hu and Y. Deng, *Adv Mater.*, 2019, **31**, 1808281.
8. B. Zhang, C. Zhu, Z. Wu, E. Stavitski, Y. Lui, T. Kim, H. Liu, L. Huang, X. Luan, L. Zhou, K. Jiang, W. Huang, S. Hu, H. Wang and J. Francisco, *Nano Lett.*, 2020, **20**, 136-144.
9. Q. Zhou, Z. Zhang, J. Cai, B. Liu, Y. Zhang, Z. Wang, *Nano Energy*, 2020, **71**, 104592.
10. S. Li, C. Cheng, X. Zhao, J. Schmidt, A. Thomas and Shuang Li, *Angew. Chem.*, 2018, **130**, 1874-1880.
11. Y. Tian, X. Liu, L. Xu, D. Yuan, Y. Dou, J. Qiu, H. Li, J. Ma, Y. Wang, D. Su and S. Zhang, *Adv. Funct. Mater.*, 2021, **31**, 2101239.
12. Z. Wu, X. Lu, S. Zhang and X. Lou, *Adv. Funct. Mater.*, 2020, **30**, 1910274.

13. Y. Guo, J. Zhang, H. Xia, M. Zhou, J. Li, Y. Qiao and Q. Xu, *Adv. Funct. Mater.*, 2018, **28**, 1805641.
14. H. Li, J. Wang, R. Qi, Y. Hu, J. Zhang, H. Zhao, J. Zhang and Y. Zhao, *Appl. Catal., B*, 2021, **285**, 119778.
15. J. Sun, S. Lowe, L. Zhang, Y. Wang, K. Pang, Y. Wang, Y. Zhong, P. Liu, K. Zhao, Z. Tang and H. Zhao, *Angew. Chem., Int. Ed.*, 2018, **57**, 16511.
