# Supplementary material for: Associating Co single atoms with RuO2nanoparticles anchor on nitrogen-doped ultrathin porous carbon nanosheets as effective bifunctional oxygen electrocatalysts for rechargeable Zn–air batteries
Source: Royal Society of Chemistry journal article supplement (doi:10.1039/d3ta03197g), 2023-01-01
Supplement: d3ta03197g2.pdf [file d3ta03197g2.pdf]

**Voice**

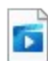

Zn-air  
battery.mp4

**Voice 1** : The voice of a light-emitting diode (LED) lighted by a ZAB assembled by  $\text{Co}_{\text{SA}}\text{-RuO}_2\text{-NUCN}$ .
